# Supplementary material for: Evaluating spatial patterns of seasonal ozone exposure and incidence of respiratory emergency room visits in Dallas-Fort Worth
Source: PeerJ journal article supplement (doi:10.7717/peerj.11066), 2021-04-13
Supplement: PUDF_Processed_Summary_2007-2016.zip [file PUDF_Processed_Summary_2007-2016.zip]

## Sheet: Sheet1
PAT_ZIP	2007Q1	2007Q2	2007Q3	2007Q4	2008Q1	2008Q2	2008Q3	2008Q4	2009Q1	2009Q2	2009Q3	2009Q4	2010Q1	2010Q2	2010Q3	2010Q4	2011Q1	2011Q2	2011Q3	2011Q4	2012Q1	2012Q2	2012Q3	2012Q4	2015Q1	2015Q2	2015Q3	2015Q4	2016Q1	2016Q2	2016Q3	2016Q4
75013	0.0704545	0.0389016	0.0483193	0.0377358	0.0737327	0.0366133	0.0319149	0.0374016	0.0470588	0.0524017	0.0343434	0.060423	0.0528455	0.0636943	0.0446429	0.0609037	0.039548	0.0436364	0.043222	0.0689655	0.0579439	0.0559846	0.0404412	0.0400668	0.0577933	0.046875	0.049236	0.0344288	0.040747	0.04	0.0599078	0.0678514
75119	0.0595506	0.0595568	0.0597758	0.0480226	0.0471464	0.0341463	0.0515222	0.0415704	0.0393975	0.0464241	0.045292	0.0680272	0.0650118	0.0616352	0.0391892	0.0634278	0.0456919	0.0547074	0.0462131	0.0408719	0.0514208	0.0648415	0.045273	0.0575342	0.0599144	0.0392442	0.0362117	0.0579937	0.0337423	0.04782	0.0409836	0.0460432
75246	0.0461538	0.0384615	0.0551181	0.1	0.0431034	0.0222222	0.0322581	0.0754717	0.0857143	0.0642202	0.0630631	0.11811	0.0952381	0.05	0.0505051	0.0810811	0.102804	0.0740741	0.0916667	0.0695652	0.0638298	0.0818182	0.0791367	0.116438	0.126984	0.0789474	0.0930233	0.130769	0.0803571	0.113636	0.111111	0.0794702
76014	0.0695538	0.0511034	0.0529101	0.0548977	0.0681818	0.0582278	0.0362573	0.0478781	0.0627907	0.0379902	0.0381443	0.0420792	0.0588235	0.0616114	0.0441176	0.0609613	0.0611303	0.0718954	0.0633214	0.0645161	0.076484	0.069161	0.0510083	0.0518433	0.0729614	0.0679825	0.0578231	0.0785936	0.0722348	0.0567929	0.0524109	0.0700637
75143	0.0478927	0.0565693	0.0612613	0.0515654	0.060219	0.0409357	0.0526316	0.0332103	0.0438095	0.059761	0.0390144	0.0601093	0.056338	0.0524109	0.0644567	0.0519751	0.0892532	0.0642398	0.0534759	0.072314	0.0740741	0.0552585	0.0492424	0.077551	0.0570866	0.0631579	0.074	0.0672098	0.0622642	0.0580645	0.0618557	0.080786
76001	0.0735552	0.0629032	0.036566	0.0652921	0.0724138	0.0497427	0.0612245	0.0911854	0.0777958	0.0770519	0.049505	0.0515759	0.0743363	0.0493631	0.0535714	0.0780031	0.0831974	0.0582524	0.0356037	0.0602782	0.0597738	0.0734463	0.0530421	0.0599415	0.0794393	0.0684039	0.0777935	0.0722543	0.0878274	0.0617089	0.0696203	0.0525478
76031	0.07	0.0550725	0.0529801	0.0685921	0.0878049	0.0652174	0.091195	0.0831826	0.0895522	0.0735043	0.0802048	0.0831974	0.121864	0.0719178	0.0920354	0.0934891	0.100372	0.0762565	0.0887681	0.0785441	0.0727273	0.0929054	0.0718232	0.045045	0.126065	0.0822669	0.0975177	0.0887772	0.10461	0.115385	0.0644599	0.106667
75071	0.0418535	0.0543319	0.0393812	0.0618557	0.0581717	0.0633284	0.0684524	0.0655226	0.0628931	0.0558659	0.0485564	0.0688913	0.0642857	0.0614934	0.0476858	0.0557621	0.0611247	0.0534699	0.0749149	0.0702427	0.0603015	0.0706456	0.0584016	0.0606796	0.0487013	0.0783316	0.0618861	0.0511247	0.0533333	0.0589431	0.0645161	0.0654397
75144	0.0526316	0.09	0.0471698	0.0555556	0.0325203	0.0530303	0.0162602	0.0697674	0.0859375	0.0746269	0.0392157	0.105691	0.0491803	0.00806452	0.0666667	0.0454545	0.034965	0.0603448	0.0743802	0.0841121	0.0825688	0.0555556	0.0504202	0.0839695	0.0617284	0.0512821	0.040404	0.0416667	0.0408163	0.0619469	0.025	0.0661157
75189	0.0510638	0.0455446	0.0408163	0.0488372	0.0681818	0.0291971	0.042065	0.0360721	0.0491803	0.0436137	0.0335306	0.0478723	0.0708812	0.0622711	0.0258621	0.0311927	0.0506823	0.0471014	0.0490909	0.0503876	0.0447471	0.0385321	0.0380952	0.0460653	0.0601504	0.0725191	0.0600343	0.0366057	0.0425532	0.053913	0.0617886	0.0579495
76067	0.0466926	0.0520231	0.0449927	0.0518053	0.0363901	0.04329	0.04426	0.0464441	0.0648415	0.0319149	0.0662906	0.0693333	0.0677966	0.0658083	0.0755814	0.0629921	0.0704023	0.0492537	0.0762712	0.0495627	0.0468521	0.0718654	0.0507757	0.0714286	0.0447552	0.0510949	0.0710456	0.0526316	0.0684932	0.0617284	0.0553746	0.0576369
76433	0		0.0285714					0		0.0285714	0.05	0.0322581	0	0	0	0.0909091	0.0277778			0.181818	0.117647		0		0.0645161	0.135135		0.0294118		0.0454545	0.0930233	0.0571429
75224	0.0562162	0.0538213	0.06469	0.0523198	0.0556128	0.0433031	0.0401961	0.0522388	0.0573858	0.0619195	0.0518445	0.0666667	0.0687773	0.0596379	0.0606996	0.0728477	0.0741163	0.0605686	0.0431739	0.0555556	0.0762813	0.0588877	0.0603814	0.05902	0.0516039	0.0631443	0.0611413	0.0661157	0.0595238	0.0819246	0.0646259	0.0789793
75146	0.0546529	0.0561983	0.0631912	0.0746528	0.0567951	0.0582707	0.0720412	0.0708661	0.0749543	0.0826271	0.0542495	0.0853081	0.0856611	0.0636516	0.0870337	0.0783582	0.0650995	0.0897436	0.0821918	0.0568627	0.0687285	0.0842294	0.0604396	0.0831858	0.0753676	0.084991	0.0974155	0.0809129	0.0789474	0.0810811	0.0867925	0.0736301
76087	0.0656028	0.0581395	0.0415282	0.0558376	0.0707965	0.0571429	0.0479233	0.0686106	0.0783699	0.0590842	0.0611621	0.0796992	0.091222	0.0806916	0.0636364	0.0809061	0.0722543	0.0531915	0.0528846	0.0551416	0.0641892	0.0526316	0.0514019	0.0648968	0.0620155	0.0525547	0.066092	0.0668486	0.0642202	0.0842857	0.0526316	0.05613
75160	0.0628466	0.043578	0.0627219	0.0673887	0.0547945	0.0540852	0.0500642	0.0482509	0.0853392	0.0741504	0.068323	0.0720339	0.0890985	0.100207	0.0365505	0.0705596	0.0752809	0.0800493	0.059952	0.0703704	0.0636605	0.039239	0.0382848	0.0683891	0.0826331	0.0603318	0.0458015	0.052349	0.0714286	0.056338	0.0545939	0.0471429
75752	0.0361991	0.0534759	0.039604	0.026738	0.0478261	0.0446429	0.0454545	0.0315789	0.0434783	0.049505	0.0305677	0.0324074	0.0340426	0.0153846	0.0199005	0.0348837	0.0828729	0.0604396	0.0617284	0.031746	0.0298507	0.0295567	0.0588235	0.0364583	0.040404	0.0343137	0.035503	0.0259067	0.0454545	0.03	0.0292398	0.0153846
76453	0.0882353	0.0967742	0	0.0645161		0			0.025	0.0344828					0.0645161	0	0	0.0731707	0.0645161		0	0	0.0606061					0.037037	0	0.0967742	0.1	0
76665	0.0204082	0.0333333	0.030303	0.0363636	0.122807	0.0877193	0.0784314	0	0	0.0806452	0.0588235	0.0517241	0.0909091	0.0384615	0.02	0.0178571	0.0681818	0.06	0.0217391	0.0188679	0.0428571	0.0566038	0.0545455	0.0208333	0.025974	0.0434783	0.0229885	0.0333333	0.0941176	0.0434783	0.1	0.0571429
75142	0.0254237	0.0465517	0.0409982	0.0297619	0.0483333	0.0393996	0.0285205	0.0511247	0.0524272	0.0457256	0.0578231	0.074856	0.0562613	0.0541958	0.0367893	0.0508167	0.0614203	0.0663984	0.0659134	0.0794824	0.0833333	0.0815603	0.0675422	0.0592734	0.0527344	0.104294	0.091954	0.0716981	0.0750469	0.0865191	0.0905797	0.0581818
75254	0.034413	0.0375276	0.0366379	0.0461538	0.0454545	0.0519187	0.0442105	0.0375276	0.0506329	0.0730689	0.0466102	0.0620805	0.0479303	0.0514403	0.0313808	0.0288462	0.062212	0.0448343	0.0481696	0.040856	0.0271399	0.0407332	0.0381356	0.0407407	0.0549199	0.0519481	0.0317125	0.0506329	0.0566449	0.052	0.0645161	0.0691145
75116	0.0977312	0.0620155	0.098646	0.0811321	0.0787879	0.0584795	0.0425963	0.0833333	0.0883534	0.0718954	0.0767591	0.0604288	0.0510806	0.0608519	0.0691824	0.0536779	0.0782443	0.065764	0.0639098	0.0565657	0.0662252	0.0792453	0.0633947	0.0682261	0.0765766	0.088843	0.0473118	0.0752427	0.0636943	0.0895197	0.0829694	0.0748988
76484		0.08			0.0322581	0.025	0.027027		0.0857143		0.030303	0.0227273	0.0333333	0.0333333	0.0606061	0					0.03125		0.0555556		0.0625			0.0714286		0.0333333	0.037037	0.111111
75233	0.0465116	0.0610687	0.0593607	0.0666667	0.0576441	0.0573566	0.0595238	0.0545906	0.0628272	0.0594059	0.037037	0.0802005	0.0805687	0.0810811	0.0507246	0.0509709	0.0736342	0.0578035	0.0348525	0.0488506	0.0755814	0.0737463	0.074928	0.0748663	0.119318	0.0727848	0.0680473	0.0984043	0.0779944	0.0816327	0.0899743	0.0729927
75440	0.0642202	0.0463918	0.025974	0.0218978	0.0523256	0.0457516	0.0192308	0.0461538	0.0266667	0.0117647	0.017341	0.0596026	0.0234375	0.0463576	0.0326797	0.0507246	0.025641	0.0211268	0.00694444	0.027027	0.0542636	0.0322581	0.0185185	0.0580645	0.0534759	0.0471698	0.0328638	0.0422535	0.0552995	0.0914286	0.0507614	0.102679
75080	0.059637	0.0597976	0.0424128	0.0642284	0.0633245	0.0594796	0.0420561	0.0538401	0.0660592	0.0605346	0.053065	0.0584936	0.0756144	0.0636079	0.0454097	0.0520282	0.0693161	0.0507042	0.0494363	0.0597771	0.0599034	0.0501505	0.0523077	0.0477477	0.0850643	0.0762548	0.0546654	0.061762	0.0811359	0.0644851	0.0577114	0.0626151
76258	0.0662983	0.049505	0.0707965	0.0646766	0.0422535	0.056872	0.065	0.0558659	0.0777202	0.0881057	0.0687831	0.075	0.0659341	0.0494505	0.0465116	0.028436	0.0773481	0.0666667	0.047619	0.0805687	0.0659341	0.0534759	0.0445545	0.0342857	0.0333333	0.0670103	0.0669856	0.0514286	0.0641711	0.0601093	0.0852273	0.0569948
75212	0.0750293	0.0757212	0.0633374	0.0574282	0.0920555	0.0705053	0.0735294	0.0823096	0.0793651	0.0705128	0.0748792	0.0990099	0.0759637	0.0842491	0.078219	0.0576087	0.0790094	0.0762274	0.0613208	0.0831382	0.0733831	0.0820265	0.0753828	0.0644105	0.0714286	0.0759312	0.0699865	0.0729927	0.0788486	0.080163	0.0726392	0.0823699
75474	0.0697248	0.0690236	0.0627119	0.056239	0.0745763	0.0434783	0.0699433	0.0446281	0.0628183	0.0664452	0.0520646	0.0578818	0.0600343	0.0683012	0.0406886	0.0810345	0.0432331	0.0767754	0.0666667	0.0653358	0.0528302	0.0523364	0.0531309	0.0758755	0.0534653	0.0720339	0.0665399	0.0607843	0.0901961	0.0750469	0.0712831	0.0729927
75094	0.0308123	0.0381679	0.026455	0.0497382	0.0462725	0.0397727	0.0214286	0.0526316	0.0453258	0.0507463	0.0247253	0.0410678	0.0513595	0.0541311	0.0498442	0.0640669	0.0498534	0.0487106	0.0803859	0.0495627	0.0854093	0.0578512	0.0568182	0.0320856	0.0497238	0.0380952	0.05625	0.0356164	0.0596206	0.0662983	0.0447284	0.0570571
75489	0.0731707	0.0425532	0	0	0	0.0181818	0.0344828	0.0322581	0.0178571	0.0454545	0.0222222	0.122449	0.0555556	0.0645161	0.03125	0.0769231	0.0666667	0.0606061	0.0285714		0.1			0.0833333		0.0416667	0.2	0.15	0.0769231	0.1875	0.142857	0.190476
76401	0.0589198	0.046549	0.037415	0.0656	0.0518395	0.0745614	0.0491228	0.0740181	0.0618238	0.0542522	0.0607029	0.0612245	0.0641447	0.0369069	0.0600649	0.0469799	0.0565724	0.0571924	0.0637584	0.0726073	0.0478011	0.0567766	0.0593368	0.0676568	0.081803	0.078534	0.0638978	0.0539216	0.0590778	0.0758294	0.0708899	0.0646109
76431	0.0247934	0.0615385	0.019802	0.0412371	0.0583333	0.0510204	0.0344828	0.0679012	0.0952381	0.0754717	0.0483871	0.0961538	0.0363636	0.0306122	0.0689655	0.0561798	0.0505051	0.0462963	0.0672269	0.0416667	0.0666667	0.0555556	0.010989	0.0232558	0.039604	0.0598291	0.0619469	0.0636364	0.05	0.0300752	0.0707071	0.0555556
75137	0.0729614	0.0522565	0.0481651	0.0807692	0.0890411	0.0774487	0.0553506	0.0857143	0.0746888	0.107656	0.0525164	0.0828025	0.0696629	0.0674419	0.0796646	0.0728051	0.0669546	0.0371179	0.0590717	0.0588235	0.0579399	0.0703625	0.0685484	0.0910816	0.0699774	0.0997877	0.0615034	0.0674699	0.0745614	0.0684597	0.0790068	0.0751073
75226	0.032967	0.0714286	0.0821918	0.0392157	0.012987	0.0649351	0	0.0980392	0.0178571	0.0113636	0.0149254	0.0416667	0.0166667	0.0666667	0.04	0.0361446	0.135135	0.0289855	0.0945946	0.0581395	0.0188679	0.108108	0.0784314	0.111111	0.0166667	0.102041	0.0526316	0.0735294	0.111111	0.0588235	0.0909091	0.0853659
76230	0.0253906	0.0441501	0.0316742	0.030303	0.0451389	0.0368852	0.0502092	0.045614	0.0321543	0.0371747	0.0247934	0.0416667	0.0586081	0.0262172	0.0266667	0.023622	0.0652174	0.0301887	0.052381	0.044898	0.0357143	0.0344828	0.0368852	0.0543933	0.0453333	0.0288714	0.0291777	0.0393939	0.057047	0.0339506	0.025974	0.0412698
76234	0.0513919	0.0393873	0.0462555	0.0325866	0.0430712	0.0298507	0.0247191	0.0558659	0.051756	0.030837	0.0443038	0.0510806	0.0594966	0.0509978	0.0351288	0.0534884	0.0561555	0.0333988	0.0348837	0.0366748	0.0503432	0.0513447	0.0501193	0.0607735	0.0465686	0.0375587	0.0398126	0.0653266	0.061828	0.0242915	0.0522244	0.0402685
76240	0.0520231	0.0503751	0.0494845	0.0492462	0.0435203	0.0378549	0.032381	0.0465808	0.0465347	0.0339703	0.0483516	0.0533199	0.0545852	0.0446429	0.0362954	0.0490654	0.0498753	0.0480769	0.0316901	0.0484848	0.0674603	0.0384615	0.0601375	0.0583942	0.0512821	0.0430925	0.0446304	0.0451843	0.0539568	0.0519645	0.0550898	0.0523322
76449	0.0131579	0.0266667	0	0.0365854	0	0.037037	0	0.04	0	0.025	0.030303	0.0384615	0	0.025641	0.0379747	0.0365854	0.032967	0.0612245	0.0384615	0.0133333	0.12069	0.0153846	0.0246914	0.057971	0.0344828	0.0597015	0.0983607	0.0357143	0.0857143	0.0571429	0.0714286	0.078125
76458	0.0205479	0.0410959	0.035461	0.0307692	0.0211268	0.00787402	0.015625	0.034965	0.0536913	0.0150376	0.0492958	0.0810811	0.0347222	0.0205479	0.0608108	0.034965	0.0692308	0.0379747	0.0757576	0.016	0.0687023	0.0153846	0.0486111	0.0620155	0.0855263	0.0390625	0.0403226	0.0437158	0.0357143	0.0743802	0.0177515	0.0451613
76255	0.0467836	0.025974	0.0300752	0.0431034	0.030303	0.0357143	0.0267857	0.0357143	0.0266667	0.0465116	0.0183486	0.0403226	0.0252101	0.042735	0.0444444	0.0245902	0.0833333	0.0895522	0.0526316	0.0517241	0.0210526	0.0229885	0.0550459	0.0851064	0.0461538	0.0246305	0.0266667	0.0372671	0.0285714	0.0120482	0.0114943	0.0510949
76272	0.0121212	0.0328947	0.0516129	0.0758621	0.0416667	0.0779221	0.0344828	0.0754717	0.0671642	0.0522876	0.0364964	0.0625	0.0612245	0.0544218	0.0675676	0.0629371	0.0289855	0.0738255	0.0325203	0.046729	0.0666667	0.0458716	0.0425532	0.0708661	0.0598291	0.0793651	0.0567376	0.0619469	0.0687023	0.0681818	0.0479452	0.0610687
76273	0.0291545	0.0489914	0.0657895	0.0291545	0.0507937	0.0381944	0.0327381	0.0428135	0.0362538	0.0423729	0.0373832	0.0592105	0.04	0.0622568	0.0561404	0.0694444	0.0486891	0.0547945	0.0273973	0.045977	0.0714286	0.0482456	0.0375	0.0376569	0.0614525	0.0688525	0.0639098	0.0482759	0.0827068	0.0577617	0.0709459	0.071875
75210	0.0853242	0.105072	0.0841751	0.0849673	0.047619	0.080292	0.0830189	0.0646259	0.108392	0.0915493	0.0878788	0.0523077	0.0824373	0.0856031	0.0971223	0.0855263	0.0730159	0.113122	0.102473	0.0705394	0.117241	0.130282	0.080292	0.0794702	0.115942	0.0945455	0.10084	0.0978261	0.0709677	0.0888031	0.0965517	0.0782313
76148	0.0650407	0.0479134	0.0480929	0.0570571	0.053068	0.046252	0.0617284	0.0695103	0.0902896	0.0957096	0.0819398	0.0727273	0.0670103	0.0708263	0.0791506	0.0769231	0.0802676	0.0796178	0.0657277	0.077187	0.0751342	0.0679934	0.0604491	0.075	0.0946844	0.0862866	0.079932	0.0912162	0.0869565	0.0829493	0.0869565	0.0740741
76634	0.0381679	0.0393701	0.0353982	0.0307692	0.0546875	0.0625	0.0344828	0.0225564	0.0653595	0.0384615	0.0390625	0.0566038	0.057554	0.0428571	0.0210526	0.0612245	0.027972	0.0643275	0.0419162	0.0487805	0.0162602	0.0592105	0.0769231	0.0169492	0.0487805	0.0751174	0.078125	0.0972973	0.0865385	0.058296	0.0594059	0.0511628
76010	0.0385588	0.0327869	0.0351226	0.0384615	0.047619	0.0506425	0.0481283	0.0485502	0.0464499	0.0426829	0.0554172	0.0418293	0.0438957	0.0553191	0.0469755	0.0676359	0.0716253	0.0663684	0.0455516	0.0550326	0.0586183	0.0567568	0.0491453	0.0591279	0.0713224	0.0663934	0.0738508	0.0606936	0.055088	0.071682	0.0628743	0.0604317
76039	0.0497925	0.0529248	0.0599415	0.0624071	0.0428769	0.0485714	0.0505464	0.0503817	0.0524194	0.0545194	0.0465753	0.0664994	0.0708215	0.0357616	0.0571827	0.0662983	0.0896861	0.0793893	0.0561497	0.0492958	0.0661871	0.0585831	0.0423601	0.0692308	0.0638607	0.0756534	0.0633609	0.068917	0.0904255	0.0737589	0.0808729	0.0757021
75169	0.0348028	0.0444444	0.032882	0.0583804	0.0526316	0.0576132	0.0434783	0.0395833	0.0495413	0.0426357	0.0672727	0.0628272	0.0658363	0.0727273	0.035309	0.0347648	0.0647619	0.0520231	0.049896	0.0563991	0.0561798	0.0411215	0.0453461	0.0438144	0.0843882	0.0488323	0.0458167	0.0665281	0.0502008	0.0515021	0.0387755	0.0442656
76088	0.101961	0.0805861	0.0562249	0.0677291	0.0496689	0.0594059	0.0515464	0.0536913	0.0795848	0.0365449	0.046875	0.0822368	0.0871212	0.0898551	0.0727848	0.0652174	0.0754098	0.0666667	0.0727969	0.0752688	0.0719697	0.040678	0.0743243	0.0561056	0.0413793	0.0377358	0.0567376	0.0501931	0.0598007	0.0649351	0.0755287	0.0510511
76104	0.0840752	0.074672	0.0666032	0.078125	0.0792812	0.0625	0.064764	0.0827375	0.0844773	0.0906183	0.0899471	0.0704501	0.096603	0.0812183	0.0823893	0.0846561	0.0891393	0.107514	0.0893054	0.103139	0.0852974	0.0893665	0.0991217	0.0729295	0.112069	0.106464	0.124679	0.12931	0.117139	0.107188	0.0949519	0.100473
76111	0.0506108	0.0438312	0.04	0.0606509	0.0458404	0.0510563	0.0423012	0.0432612	0.0424779	0.0532446	0.0466667	0.0732064	0.0467446	0.0648148	0.0457875	0.043088	0.0598706	0.0641447	0.0617284	0.0762565	0.0599647	0.0685155	0.0564103	0.030303	0.0633397	0.0824742	0.084507	0.0740038	0.0657084	0.0776014	0.0659134	0.0617978
76033	0.0713436	0.0836551	0.0482759	0.0813953	0.0811429	0.0744186	0.0455607	0.0663765	0.0902413	0.0784983	0.0681564	0.0903156	0.0961749	0.0798611	0.0883002	0.0835214	0.0936455	0.0858824	0.0935335	0.0811725	0.0959446	0.0959821	0.0798722	0.105207	0.0955556	0.115505	0.0919305	0.107322	0.0864865	0.0982049	0.105206	0.0961969
75472	0.0729927	0.0357143	0.0545455	0.0485437	0.115385	0.0645161	0.0526316	0.0701754	0.0560748	0.125	0.0347826	0.0684932	0.0681818	0.1	0.0862069	0.045977	0.0898876	0.06	0.0679612	0.0631579	0.0375	0.0813953	0.0392157	0.0789474	0.0930233	0.0507246	0.0423729	0.0566038	0.0970149	0.0825688	0.0265487	0.0530303
76137	0.0344168	0.0474834	0.062201	0.0652591	0.0425532	0.0714286	0.0503802	0.0698299	0.0734201	0.0674789	0.0581281	0.0589147	0.0721248	0.0545791	0.0648889	0.0639098	0.0753488	0.0738255	0.054386	0.057377	0.0678571	0.0700525	0.0773694	0.0520179	0.0917969	0.0695652	0.0738488	0.0683983	0.0973067	0.0894378	0.0767241	0.0836622
76182											0.0328638	0.0608273	0.0759494	0.0547046	0.0460358	0.0705882	0.0687204	0.0584416	0.0857143	0.0773585	0.0781893	0.0839552	0.0580271	0.080895	0.0755396	0.0883459	0.0894569	0.056926	0.0641711	0.0941176	0.0724876	0.0564024
75751	0.0432852	0.0418301	0.0588915	0.0503145	0.0494382	0.0705053	0.0519481	0.0375758	0.0668287	0.0492005	0.0439414	0.065073	0.0543881	0.0468541	0.0339426	0.0412903	0.0495437	0.0374677	0.0391892	0.0416089	0.0534759	0.0703593	0.042618	0.0459318	0.0317003	0.0548387	0.0523952	0.0277778	0.0442623	0.038835	0.0395189	0.0450886
75205	0.0363636	0.0451977	0.0290698	0.0534125	0.0456026	0.0414201	0.0583942	0.0506329	0.0414365	0.0321543	0.0411765	0.0421348	0.0529412	0.0560472	0.0598007	0.0631868	0.0686016	0.0447761	0.0601266	0.0804196	0.0517711	0.0526316	0.0686567	0.0328767	0.0604982	0.0858209	0.0564263	0.0579268	0.0411392	0.0736544	0.0381944	0.0608108
75109	0.037037	0.0352941	0.0757576	0.0253165	0.0923077	0.0606061	0.0224719	0.0595238	0.075	0.038961	0.0361446	0.152778	0.103093	0.0952381	0.0340909	0.0925926	0.08	0.0851064	0.0186916	0.034188	0.0645161	0.0784314	0.0526316	0.0744681	0.0754717	0.0493827	0.0461538	0.02	0.0843373	0.0934579	0.0909091	0.0909091
75158	0.0619469	0.0512821	0.0322581	0.0294118	0.0708661	0.0550459	0.0176991	0.0447761	0.0647482	0.0592593	0.100719	0.12	0.0847458	0.0480769	0.0373134	0.0588235	0.0789474	0.0327869	0.0676692	0.0909091	0.0891089	0.0625	0.0458015	0.107438	0.123596	0.0508475	0.0763359	0.047619	0.101449	0.064	0.0689655	0.0877193
76265	0.0131579	0.0338983	0.0307692	0.0588235	0.0363636	0.0483871	0.0816327	0.0769231	0.0769231	0	0.0816327	0.170732	0.0697674	0.114286	0	0.0769231	0.0714286	0.0727273	0.114286		0.0243902	0	0.0681818		0.031746	0.0666667	0.0461538	0.0333333	0.057971	0	0.0410959	0
76002	0.0427807	0.0343699	0.0469799	0.0392857	0.0516129	0.0513644	0.0498392	0.0505529	0.0435459	0.0618401	0.0547753	0.0580076	0.0556553	0.0558069	0.056962	0.0567261	0.0506993	0.0496454	0.0642055	0.0397112	0.0470163	0.0636833	0.0503597	0.0578778	0.0793388	0.0589124	0.0549273	0.0482529	0.0852575	0.0547945	0.0649351	0.0411392
75402	0.0647841	0.057041	0.0568807	0.052356	0.0722311	0.0491228	0.0405157	0.0430712	0.0464716	0.0625	0.032381	0.0407451	0.045283	0.0457143	0.0380762	0.0299065	0.0372671	0.0420842	0.0266667	0.0384615	0.0432432	0.0578035	0.0670732	0.061706	0.0583658	0.0804124	0.0767717	0.0851064	0.0676692	0.0614754	0.0611111	0.0630182
75244	0.0660661	0.0487805	0.0237288	0.0309859	0.0431267	0.0479042	0.0355987	0.0513595	0.0487805	0.046595	0.0539683	0.060241	0.0795107	0.046595	0.0638978	0.0354331	0.0515464	0.0648464	0.0363128	0.0542373	0.0486111	0.0840336	0.0412698	0.0694864	0.0714286	0.0508475	0.0618182	0.0517241	0.0688525	0.062069	0.0673401	0.0528169
75249	0.0779661	0.0671378	0.0986395	0.0664653	0.111842	0.0792079	0.0666667	0.0573248	0.101754	0.0681004	0.0795107	0.0676923	0.0607029	0.0821918	0.0701754	0.0867052	0.115385	0.0865052	0.0662651	0.0782313	0.0688406	0.0584615	0.0656716	0.0442478	0.090301	0.0734694	0.0594059	0.0985507	0.0671378	0.05	0.0704698	0.0626959
75251	0.0683761	0.025974	0.0176991	0.0196078	0.017094	0.0454545	0.0630631	0.0465116	0.0408163	0.0598291	0.0185185	0.0738255	0.0648148	0.0390625	0.0654206	0.0708661	0.048	0.0729927	0.0805369	0.0503145	0.0538922	0.0609756	0.0576923	0.0621118	0.117904	0.100457	0.0773196	0.0487805	0.0714286	0.10917	0.0304348	0.107011
76054	0.028169	0.0604982	0.028125	0.0625	0.0550459	0.0735786	0.0609756	0.03	0.071875	0.0517799	0.0515464	0.0619469	0.0690789	0.0724638	0.0668605	0.0411765	0.057971	0.0670927	0.0311526	0.0749186	0.089404	0.0627063	0.0311526	0.091195	0.0963855	0.0751634	0.0860927	0.0564263	0.0873494	0.0730897	0.0754717	0.0681004
76201	0.0706667	0.081761	0.0582822	0.0580431	0.0676471	0.0721501	0.0688468	0.0756677	0.0884354	0.0609952	0.0733945	0.067696	0.0595668	0.0622951	0.054386	0.0568356	0.0747384	0.0445151	0.0599078	0.0633147	0.0837521	0.0804795	0.0706522	0.0702087	0.104167	0.0670391	0.0923423	0.0846774	0.0881764	0.0867769	0.0605428	0.0753968
75041	0.0385051	0.0422857	0.0396376	0.0716763	0.0663765	0.0546512	0.0379747	0.0503513	0.047619	0.0416667	0.0347395	0.0465658	0.0623501	0.0477897	0.0580645	0.0468557	0.0568603	0.045	0.0433255	0.0488677	0.0639098	0.0665138	0.0451031	0.067659	0.0567742	0.0675497	0.0449438	0.0696452	0.0724638	0.0620957	0.0578888	0.0640205
76426	0.0326975	0.0349462	0.0401146	0.0204082	0.0396825	0.0306748	0.0416667	0.0538793	0.0585106	0.0339426	0.0381862	0.0425	0.0415335	0.0526316	0.0657895	0.0380952	0.0302198	0.048433	0.0460526	0.0280112	0.0601093	0.0453172	0.0430464	0.0553746	0.0513595	0.0659026	0.0606061	0.0641026	0.0381944	0.048913	0.0705882	0.0660377
76078	0.0362694	0.0301508	0.0655022	0.0268817	0.0735931	0.0694444	0.0582524	0.0674157	0.116505	0.0315315	0.0673575	0.0855615	0.102151	0.0424528	0.0358974	0.0331754	0.0740741	0.0440529	0.0675676	0.0728155	0.0633484	0.0555556	0.0664062	0.0488889	0.05	0.0754717	0.0637255	0.0318725	0.107477	0.0876494	0.0669291	0.0664062
75147	0.0480226	0.0427632	0.0483384	0.0567376	0.0588235	0.0458716	0.0522648	0.0501672	0.0522876	0.0465116	0.0411765	0.0484848	0.0576923	0.0382353	0.0505051	0.0433333	0.0626866	0.0479705	0.0530035	0.0330882	0.0738007	0.0742049	0.0481481	0.0337079	0.0648855	0.0585774	0.0522088	0.039823	0.0723982	0.0576923	0.034749	0.039823
76048	0.0791826	0.0607287	0.0429958	0.0660377	0.0687135	0.0707965	0.0561151	0.0570108	0.0797799	0.0756303	0.0601852	0.0706522	0.0578387	0.0619112	0.0574018	0.0525526	0.0750751	0.0654952	0.0459418	0.0772727	0.0538117	0.0626781	0.0474684	0.0394737	0.0601604	0.0473062	0.0451031	0.0478088	0.0692695	0.0734745	0.0549872	0.0603338
75237	0.0905433	0.0826613	0.072314	0.0757576	0.0748663	0.084	0.078125	0.0705009	0.0926916	0.106426	0.0866142	0.0868794	0.113553	0.0792079	0.103383	0.0742115	0.0927835	0.0872211	0.0881226	0.0698152	0.107004	0.0864662	0.106796	0.120594	0.0782779	0.126068	0.10596	0.10338	0.0812379	0.101293	0.0940919	0.103175
75058	0.015625	0.0294118	0.0309278	0.0666667	0.025641	0	0.0421053	0.0684932	0.08	0.0338983	0.0394737	0.046729	0.0659341	0.0952381	0.038961	0.0588235	0.0481928	0.0277778	0.078125	0.025641	0.037037	0.0615385	0.0657895	0.0215054	0.0793651	0.0731707	0.0352941	0.0185185	0.04	0.1	0.025974	0.0483871
75061	0.0407609	0.0410959	0.0342205	0.0499658	0.0618982	0.0439486	0.0414365	0.0697183	0.0433376	0.0704722	0.042292	0.051199	0.0591879	0.0579399	0.0601557	0.0660248	0.069044	0.0521542	0.0463032	0.0455904	0.0607735	0.0554113	0.0580848	0.0510057	0.053206	0.0583994	0.054878	0.0519856	0.0665702	0.047513	0.0557103	0.0531097
76022	0.0403226	0.0697051	0.0527778	0.0574713	0.0446429	0.0498688	0.0545906	0.0670391	0.0638298	0.0569106	0.0518135	0.05	0.0616246	0.0755668	0.0666667	0.0586797	0.0527638	0.0724234	0.0673077	0.0749354	0.0824742	0.108808	0.0924731	0.0671642	0.0863309	0.110609	0.0956938	0.0923788	0.086758	0.0611354	0.088993	0.0661939
75414	0.038835	0.0731707	0.0288462	0.0434783	0.0566038	0.0617284	0.0550459	0.0102041	0.04	0.0438596	0.0825688	0.0238095	0.0441176	0.0987654	0.0957447	0.0769231	0.0485437	0.0425532	0.0454545	0.0470588	0.05	0.0493827	0.0425532	0.0568182	0.0943396	0.0444444	0.0705882	0.0701754	0.0941176	0.0319149	0.0833333	0.107527
76225	0.038835	0.0285714	0.0309278	0.03	0.0265487	0.0315789	0.0363636	0.0744681	0.0234375	0.0510204	0.0674157	0.0340909	0.0408163	0.0631579	0.01	0.0136986	0.0363636	0.0322581	0.0373832	0.0275229	0.0188679	0.0985915	0.0217391	0.025641	0.0108696	0.0186916	0.0238095	0.076087	0.0810811	0.0194175	0.0588235	0.0519481
75102	0.0714286	0.075	0.0625	0.152174	0.131579	0.106383	0.0408163	0.0232558	0.0833333	0.0517241	0.121951	0	0.0192308	0	0.0285714	0	0.025	0	0		0.08	0.138889	0.0857143	0.0277778	0.0208333	0.0857143		0.0285714		0.05	0.0952381	0.115385
76627	0.0533333	0.0273973	0.0111111	0.0169492	0	0.0895522	0.0175439	0.04	0.045977	0.0333333	0.0759494	0.0377358	0.0135135	0.0238095	0.0442478	0.05	0.0666667	0.046875	0.0422535	0.0298507	0.0175439	0.0689655	0.0434783	0.0454545	0.171429	0.0952381	0.0545455	0.153846	0.0714286	0.0322581	0.0625	0.122449
76114	0.0762712	0.0594059	0.064951	0.0578406	0.0715198	0.0805031	0.0498721	0.0753247	0.0700344	0.0770235	0.0653753	0.0832408	0.0926641	0.0820896	0.0634082	0.0731707	0.0716763	0.0631313	0.063591	0.0811456	0.0912647	0.0737913	0.0699482	0.0690537	0.0796345	0.0745098	0.0811594	0.0731383	0.100139	0.0923913	0.0786082	0.09601
75069	0.056052	0.0682415	0.0647419	0.065587	0.0803571	0.0714286	0.0711188	0.0617284	0.0565642	0.0524345	0.0629699	0.0705394	0.0779468	0.0676768	0.0677778	0.0677966	0.0706977	0.0574713	0.0675556	0.0690355	0.080292	0.0793499	0.069378	0.0620438	0.0803249	0.0813953	0.0636364	0.0592734	0.0786026	0.0744021	0.0697074	0.0769231
75010	0.0774487	0.0606796	0.0784314	0.0585366	0.0695652	0.0628019	0.0724638	0.0635697	0.0685579	0.0853081	0.0612245	0.061144	0.0948509	0.0745614	0.0477454	0.0475113	0.0769231	0.0426009	0.0522565	0.0428571	0.0410678	0.0662651	0.0635246	0.0529661	0.0860656	0.0641283	0.0521921	0.0521921	0.0702479	0.0833333	0.0572451	0.0721831
75230	0.0488771	0.0488467	0.0484694	0.0525624	0.0760157	0.0625	0.0452555	0.0678211	0.0612813	0.0645604	0.059322	0.0429448	0.0537791	0.0604468	0.0332851	0.0474198	0.0559254	0.0539811	0.0370879	0.0603933	0.0585034	0.0627178	0.0575342	0.045679	0.062425	0.0680958	0.0520156	0.0595855	0.0705128	0.0768246	0.0585176	0.0699387
76692	0.0526316	0.052	0.0261137	0.0480962	0.056	0.038	0.0240385	0.0366972	0.0665323	0.0400891	0.0309735	0.0576132	0.0356394	0.038055	0.0166147	0.0336842	0.0438095	0.02537	0.0196507	0.0328228	0.0443038	0.0461216	0.056	0.0494297	0.0510204	0.0501567	0.0447761	0.0797342	0.0948276	0.0595611	0.0835735	0.0714286
75090	0.0302398	0.0221519	0.0286885	0.0339181	0.0385925	0.0250896	0.0356295	0.0412121	0.0401837	0.0418204	0.0354957	0.0536585	0.0569878	0.0540915	0.0431267	0.0316857	0.0534826	0.0458839	0.039548	0.0478955	0.0523338	0.0437956	0.0297542	0.0444145	0.0534161	0.0601966	0.0667506	0.0528302	0.0631188	0.0640279	0.059194	0.0730271
76106	0.0355649	0.048124	0.048202	0.0353774	0.040404	0.0473098	0.0365145	0.0530099	0.0649123	0.0437318	0.0496084	0.0608108	0.0747664	0.0580448	0.0414703	0.0557656	0.0731225	0.055668	0.0406583	0.0538922	0.0629845	0.0568862	0.045954	0.0567595	0.0765957	0.0863931	0.0745273	0.0722348	0.0851506	0.0817884	0.0701581	0.075575
75442	0.0948905	0.0520833	0.0739437	0.0418251	0.0588235	0.0781893	0.0689655	0.100877	0.0508982	0.0796813	0.0627803	0.0659898	0.0723982	0.019685	0.0581395	0.0599251	0.0577617	0.0752212	0.0932203	0.0824373	0.0703704	0.0782609	0.0361842	0.0581395	0.0901639	0.09375	0.0693431	0.08	0.0498339	0.0514469	0.0811688	0.0714286
76036	0.0736301	0.0710744	0.052356	0.0699301	0.0928962	0.056213	0.0826833	0.0673401	0.071964	0.0629575	0.0694444	0.0670017	0.101562	0.0699405	0.0616883	0.08125	0.0745342	0.0730051	0.0588235	0.0702028	0.0757098	0.0838415	0.0885886	0.0799397	0.11146	0.0761494	0.0732087	0.0684736	0.0980392	0.0896861	0.0861183	0.0934959
76086	0.073494	0.0730198	0.0550796	0.0693431	0.0608365	0.06743	0.0755495	0.0673077	0.0755968	0.0627306	0.0544489	0.0723026	0.0993865	0.0707434	0.0655957	0.048811	0.0693333	0.0538058	0.0605187	0.0762829	0.0755245	0.0622348	0.0503817	0.0585305	0.0486577	0.0547504	0.0642857	0.0578387	0.0438066	0.0640244	0.0406732	0.0628743
76107	0.0642093	0.0691004	0.0712366	0.0607287	0.0691004	0.0522876	0.0623441	0.065703	0.086728	0.0527066	0.0527009	0.0578106	0.0623306	0.0512164	0.0687135	0.0550459	0.0808729	0.0653846	0.0680851	0.0833333	0.072445	0.0583446	0.0755556	0.0542005	0.0781711	0.0769231	0.0743073	0.0735294	0.0777778	0.10691	0.071525	0.0859671
75039	0.0630631	0.0530303	0.0208333	0.016129	0.0148148	0.0258621	0.0268456	0.0432099	0.0117647	0.0361446	0.0274725	0.0633484	0.00980392	0.0402685	0.04	0.0176991	0.0235294	0.0361991	0.0135747	0.0318182	0.0125523	0.0362903	0.02	0.0438247	0.0428571	0.0141343	0.0229508	0.0304878	0.0302115	0.0470219	0.0326797	0.0238095
75077	0.0755735	0.0586552	0.0503401	0.0686406	0.0698856	0.071599	0.0425806	0.0681159	0.0587484	0.0521512	0.0663199	0.0586081	0.0928144	0.0513176	0.0733057	0.0550206	0.0582011	0.0886767	0.05375	0.0440636	0.0671642	0.0564706	0.0633214	0.0609911	0.0789474	0.083004	0.0683761	0.0706033	0.0790816	0.0834492	0.0493827	0.0776197
75219	0.0433735	0.0465116	0.028777	0.0555556	0.0542986	0.0629067	0.0404494	0.0527523	0.0513919	0.0342466	0.0904872	0.0610526	0.0596659	0.0502392	0.0359712	0.0519802	0.0760369	0.040404	0.031941	0.0572139	0.0597015	0.0775401	0.0491803	0.0594714	0.0569307	0.0729167	0.0623441	0.0538462	0.0744417	0.0603015	0.0589623	0.0576132
76641	0.0545455	0.015625	0.0666667	0.0416667	0.0806452	0.0447761	0.0344828	0.05	0.0545455	0.0943396	0.0147059	0.047619	0.0185185	0.0454545	0.047619	0.160714	0.0892857	0.0571429	0.0612245	0	0.0246914	0.0638298	0.0882353	0.106383	0.145833	0.0652174	0.16129	0.0377358	0.0833333	0.0740741	0.137931	0.0983607
75287	0.0532915	0.0580311	0.0480573	0.0685773	0.0552712	0.0607966	0.0828729	0.0691434	0.0682773	0.0814196	0.0606362	0.0674956	0.0755873	0.0623116	0.0640074	0.0610546	0.0803059	0.0682046	0.0695238	0.057226	0.0780287	0.0823529	0.0608856	0.0633397	0.097723	0.0801491	0.0805556	0.0728972	0.0836576	0.074331	0.0774977	0.0683761
75063	0.0415282	0.0372771	0.040493	0.0471281	0.0373377	0.0382263	0.0362438	0.0279605	0.0411862	0.0346535	0.0445969	0.0508274	0.0625	0.056314	0.0457516	0.0378151	0.042522	0.0506912	0.0401235	0.0473934	0.0415973	0.0458861	0.0527778	0.0387812	0.05547	0.0416048	0.0447761	0.0398818	0.0326087	0.0382263	0.0464789	0.0371517
75023	0.0547945	0.0680203	0.0661986	0.071	0.071908	0.0761523	0.0785936	0.0669903	0.0777385	0.0767754	0.0477064	0.0768698	0.0741117	0.0577915	0.0757098	0.0697674	0.0802416	0.0640074	0.0694568	0.0734694	0.0784314	0.0684161	0.0565371	0.0777502	0.0747922	0.063279	0.0643275	0.0697897	0.0560304	0.0726577	0.060207	0.075067
76636	0.0576923	0.0350877	0.0847458	0.0178571	0	0.0192308	0.0816327	0.155556	0.0545455	0.06	0.078125	0.0882353	0.056338	0.0153846	0.116279	0.130435	0.0576923	0.0612245	0.0784314	0.153846	0.0952381	0.111111	0.0547945	0.0588235	0.031746	0.0892857	0.0833333	0.106061	0.0714286	0.109091	0.097561	0.0612245
75495	0.0512821	0.0194175	0.0206612	0.0424528	0.0514019	0.0419162	0.0326087	0.0564972	0.100402	0.0640394	0.0529101	0.0606061	0.0857143	0.0414201	0.056701	0.0526316	0.06	0.0670103	0.0595238	0.0552486	0.040201	0.0655738	0.0542986	0.0693069	0.0689655	0.0588235	0.0536585	0.0566038	0.0643564	0.0613208	0.0588235	0.0452489
76044	0.0740741	0.0576923	0.0714286	0.0707071	0.0819672	0.111111	0.0901639	0.0720721	0.111111	0.08	0.0841121	0.116667	0.0916667	0.0940171	0.0490196	0.116667	0.0756303	0.0729927	0.0967742	0.048	0.135593	0.170543	0.0348837	0.1	0.206897	0.175926	0.125	0.0642202	0.111111	0.0841121	0.0923077	0.139344
75081	0.0498132	0.0380711	0.0694611	0.0700483	0.0657734	0.0534629	0.0408922	0.0554839	0.0554187	0.0560399	0.0560191	0.076841	0.0643045	0.0640097	0.0567901	0.0742138	0.0771208	0.0584726	0.041573	0.0670886	0.0540184	0.0550796	0.0604938	0.0468187	0.0658037	0.0827068	0.0535506	0.0791444	0.0732265	0.059322	0.0543881	0.057754
75032	0.0294737	0.0449438	0.0367171	0.0360531	0.0545455	0.0339286	0.0291439	0.0307971	0.0450281	0.0410509	0.0411215	0.0708661	0.0367893	0.0417423	0.0483871	0.0438449	0.0615114	0.0325581	0.0425532	0.0713128	0.0460653	0.0461783	0.042328	0.0408859	0.0714286	0.0625	0.0582677	0.0643275	0.0641791	0.0631229	0.0783333	0.0748092
76266	0.0848806	0.0593824	0.0670241	0.0931373	0.084788	0.0663391	0.0328283	0.0694789	0.0767327	0.0732323	0.0407125	0.0841889	0.0951157	0.0639269	0.0447368	0.0703518	0.0668524	0.0589681	0.0633609	0.0651629	0.0821918	0.0684932	0.0721154	0.0811456	0.0740741	0.102828	0.0943396	0.0658436	0.0812808	0.0738255	0.0837104	0.0827586
75025	0.0607595	0.0623501	0.0367299	0.0805288	0.0476731	0.0506971	0.0532178	0.0534699	0.0605381	0.049884	0.0374707	0.0556522	0.0540897	0.0641201	0.0532276	0.0563035	0.0673317	0.0570071	0.0672074	0.0476758	0.0720391	0.0582857	0.0529279	0.0598592	0.0774732	0.0607375	0.057398	0.0543735	0.0696517	0.0809465	0.0714286	0.0781991
75054	0.0588235	0.00970874	0.02	0.0604027	0.0206897	0.0507246	0.020979	0.0346821	0.0765027	0.0122699	0.0275862	0.0685714	0.0769231	0.0597826	0.0606061	0.0573248	0.0661765	0.0606061	0.0706522	0.0621118	0.0432432	0.0957447	0.0627803	0.0517241	0.0520833	0.0526316	0.0631068	0.0555556	0.0301508	0.0343348	0.06639	0.057377
76028	0.0557202	0.0512322	0.0676741	0.0523752	0.0701754	0.0647131	0.0729229	0.0579268	0.0638177	0.0786585	0.0710511	0.0675381	0.0679157	0.0627119	0.0587893	0.0800712	0.0847659	0.0800478	0.0712515	0.0729841	0.0787037	0.0623515	0.0686642	0.0660714	0.0868861	0.0799124	0.0696168	0.0736607	0.074858	0.0883576	0.0793388	0.0733509
75167	0.0375	0.0535714	0.0729927	0.0606061	0.107595	0.0933333	0.107383	0.0592593	0.0827586	0.0962963	0.0679012	0.0785714	0.0448718	0.0662983	0.0742857	0.104938	0.0576923	0.025641	0.0502793	0.102041	0.0985915	0.0416667	0.0551724	0.100671	0.0774194	0.0661765	0.0549451	0.0531915	0.0628272	0.08	0.0526316	0.0571429
75024	0.052381	0.0310559	0.0408602	0.0491803	0.0550847	0.0587002	0.0537428	0.044964	0.0531309	0.0703422	0.0590278	0.0556258	0.0652529	0.0372549	0.0536673	0.0603015	0.0585366	0.0501618	0.0495208	0.079661	0.0663265	0.0645161	0.058309	0.0821918	0.0518519	0.0450311	0.0534591	0.0422535	0.0837139	0.0462687	0.0522496	0.0803571
75002	0.0539452	0.042735	0.036479	0.0475423	0.0630252	0.0479087	0.0514988	0.0567652	0.0640394	0.0604183	0.0623441	0.0665446	0.0512605	0.0637776	0.0514419	0.057072	0.0685155	0.0612903	0.0628059	0.0586236	0.0607553	0.0834725	0.0713213	0.0691244	0.0909091	0.0853081	0.0696946	0.0732628	0.0616987	0.0638298	0.0731332	0.0562641
75115	0.0810612	0.0741862	0.0811897	0.0831276	0.0980861	0.0813205	0.0648968	0.0883257	0.0759878	0.0818394	0.0753036	0.0876934	0.0874811	0.0935673	0.0708783	0.0890511	0.0838034	0.08	0.0729013	0.0874439	0.0808876	0.0830946	0.0678426	0.0787456	0.0748503	0.0985692	0.0841049	0.0769823	0.0927835	0.105955	0.0997799	0.10043
76119	0.0632467	0.0781711	0.0546713	0.0836076	0.0766667	0.0755245	0.0779589	0.0698455	0.11368	0.0814717	0.0809285	0.0919826	0.0869878	0.0899165	0.0907903	0.0752351	0.0984637	0.0875706	0.0881963	0.0809061	0.0945502	0.0844241	0.0867384	0.0882353	0.11501	0.106638	0.0992471	0.0846995	0.100132	0.10871	0.0950389	0.101297
75087	0.043152	0.0548673	0.0393836	0.0625	0.031339	0.0453074	0.0366826	0.0357143	0.0521127	0.0528129	0.0434783	0.0654867	0.0440061	0.0479134	0.0455259	0.0469697	0.039604	0.0367534	0.033241	0.0366972	0.0400616	0.0681818	0.0382916	0.060241	0.0600801	0.039185	0.0366972	0.0417178	0.0401035	0.0585831	0.0537241	0.0633374
75044	0.0645161	0.0432692	0.0330073	0.0630841	0.0488082	0.0565611	0.0495868	0.0640205	0.0526894	0.0509978	0.0641184	0.0627706	0.0804196	0.0735661	0.0550239	0.0736715	0.0566265	0.0542245	0.0456376	0.0643623	0.0721154	0.0684932	0.0760999	0.0592417	0.051462	0.0660264	0.0528846	0.0664207	0.0580046	0.0546075	0.0624303	0.0442177
75088	0.0622568	0.044905	0.0387205	0.0743243	0.0605565	0.0607029	0.0588235	0.0463576	0.0434783	0.0561358	0.067086	0.0664062	0.0698467	0.047619	0.0356473	0.0451389	0.0656566	0.0621762	0.0432767	0.0726073	0.0515267	0.0515298	0.0509666	0.0483871	0.0474517	0.0588235	0.046595	0.0695793	0.0461812	0.0753065	0.0632911	0.0641248
75052	0.0461802	0.0470016	0.0494994	0.0460599	0.0549695	0.0475113	0.0492754	0.0682708	0.0630005	0.0564103	0.049505	0.0633406	0.0616479	0.045657	0.0517045	0.0487677	0.0517144	0.0548164	0.038483	0.0515695	0.0674027	0.0618966	0.0556781	0.052714	0.0533553	0.0643402	0.0654362	0.0494092	0.0562293	0.0581206	0.0546022	0.0660377
75424	0.107438	0.046729	0.0625	0.0606061	0.153061	0.0654206	0.0566038	0.0733945	0.0909091	0.125	0.049505	0.0873786	0.0864198	0.0595238	0.0512821	0.0555556	0.0462963	0.0462963	0.0857143	0.0833333	0.02	0.108108	0.0833333	0.0630631	0.0204082	0.0212766	0.0594059	0.0430108	0.0470588	0.113402	0.1	0.100917
76063	0.0537543	0.0603097	0.0506024	0.0711806	0.0631413	0.0624025	0.0439137	0.0552367	0.0728477	0.0606498	0.0518519	0.0636421	0.0623501	0.0549048	0.0448569	0.0518248	0.0780303	0.0549285	0.0469592	0.0467219	0.0434164	0.0600145	0.0528541	0.0586649	0.0600462	0.0648286	0.0619082	0.0559006	0.074552	0.0808298	0.0694158	0.0674237
76227	0.0505051	0.0522244	0.0410448	0.0670391	0.0836364	0.0721063	0.0534759	0.077821	0.0698529	0.0479574	0.0543071	0.0653333	0.0849421	0.0522523	0.0656371	0.0701439	0.102041	0.0526316	0.0559701	0.0669856	0.062	0.0594228	0.0590164	0.0530547	0.0605565	0.0681818	0.0681458	0.0639881	0.0677467	0.0673653	0.0676259	0.0697051
75223	0.0473815	0.0399002	0.0325815	0.028777	0.040404	0.0538922	0.0331492	0.044335	0.0409207	0.0271003	0.0231481	0.0477327	0.0397878	0.0382353	0.0367232	0.0300752	0.0555556	0.057377	0.0420792	0.0676923	0.0708661	0.0410628	0.043956	0.0375335	0.0384615	0.0576923	0.0767196	0.0640244	0.0784884	0.0969697	0.0869565	0.0706522
76135	0.0682594	0.0677966	0.0507246	0.0482315	0.0779436	0.0565371	0.0734266	0.0680147	0.0789889	0.0727848	0.0825853	0.106038	0.0775717	0.077686	0.0840198	0.105437	0.0767947	0.0704225	0.0934579	0.0798122	0.0919881	0.0725806	0.087344	0.116487	0.109299	0.0983607	0.104425	0.10687	0.107813	0.0785824	0.122024	0.096823
75007	0.0744417	0.0713615	0.0684444	0.0768543	0.082897	0.0709904	0.0655201	0.0652866	0.0816143	0.0773861	0.0546075	0.0708237	0.0831276	0.0734619	0.0647163	0.0751391	0.0834783	0.0631579	0.0652791	0.0685558	0.0974955	0.0770677	0.0741107	0.0681416	0.0878924	0.0604344	0.0728346	0.0747664	0.0744681	0.0644231	0.0706107	0.0762489
76673	0.0909091			0		0.0222222			0.0625	0	0	0.0243902	0.0263158	0.148936			0.0882353			0.125	0.037037			0.0333333	0.05	0.0666667	0.09375	0.16129			0.0789474
75035	0.0491018	0.0373726	0.0568828	0.0420819	0.0549065	0.0383663	0.0440636	0.0551181	0.0655914	0.0427435	0.0568592	0.0467675	0.0784091	0.0719738	0.0422386	0.0663984	0.0793651	0.0554951	0.039173	0.049505	0.062954	0.0440387	0.0646465	0.0541082	0.0641466	0.0590674	0.0535714	0.0574949	0.0660592	0.0672515	0.0692076	0.0772128
75163	0.0166667	0.0294118	0.0454545	0.0438596	0.0603448	0.0803571	0.036036	0.0267857	0.0649351	0.0272727	0.0373832	0.0673077	0.0683761	0.04	0.101852	0.043956	0.0824742	0.0930233	0.0208333	0.0454545	0.0235294	0.0272727	0.0210526	0.0423729	0.00909091	0.0582524	0.0515464	0.0588235	0.0550459	0.0490196	0.0941176	0.134146
75001	0.0371517	0.0422078	0.0242215	0.0322581	0.0273038	0.0446097	0.0315315	0.0614035	0.0852713	0.0946502	0.0434783	0.0544554	0.042735	0.0392157	0.0680851	0.077551	0.0576132	0.0627615	0.0457746	0.0497925	0.0588235	0.0769231	0.0822511	0.0792952	0.0618182	0.082397	0.100402	0.0599251	0.0520446	0.0658915	0.0656934	0.0808511
75235	0.0392927	0.0410367	0.043299	0.0364372	0.0433839	0.0316027	0.0513308	0.0301811	0.0623782	0.0467091	0.0669456	0.0574468	0.0558036	0.0794045	0.0720721	0.0568421	0.0865604	0.0513447	0.0668203	0.0593824	0.0608273	0.0488432	0.0676856	0.0684932	0.0671642	0.0654206	0.0541872	0.0419426	0.0555556	0.0444915	0.0640496	0.0597345
75166	0.0227273	0.0181818	0.05	0.0769231	0.0333333	0.0294118	0.060241	0.0597015	0.08	0.0609756	0.0909091	0.0289855	0.0416667	0.0526316	0	0.0490196	0.0422535	0.0581395	0.0298507	0.0659341	0.0609756	0.0392157	0.0227273	0.0120482	0.0952381	0.0357143	0.039604	0.060241	0.0416667	0.0736842	0.046729	0.0695652
75134	0.0930693	0.0590406	0.0587084	0.0912477	0.113537	0.0671642	0.0758621	0.0902394	0.0922242	0.0986193	0.0899083	0.1	0.0871886	0.0833333	0.0973085	0.112167	0.0916667	0.0829787	0.0829787	0.0980036	0.0563107	0.106884	0.0862832	0.0861423	0.0811359	0.110204	0.0788913	0.0750988	0.0972696	0.122449	0.0951456	0.11943
75241	0.114068	0.0853659	0.107211	0.0885046	0.109145	0.10939	0.0729262	0.0970874	0.1158	0.1125	0.111002	0.096374	0.100478	0.099903	0.0922931	0.100569	0.0945034	0.0739176	0.0761278	0.0881489	0.0819672	0.0822785	0.0874882	0.0980019	0.0803296	0.0994764	0.0990415	0.0962129	0.103846	0.0904523	0.102116	0.0954163
75141	0.0283019	0.0823529	0.0190476	0.0545455	0.115789	0.03125	0.0275229	0.0990991	0.07	0.0480769	0.0673077	0.0752688	0.0860215	0.0786517	0.0833333	0.0625	0.0625	0.0821918	0.0843373	0.0731707	0.047619	0.0841121	0.0377358	0.0825688	0.0333333	0.0366972	0.0487805	0.06	0.0792079	0.0909091	0.0701754	0.1
76132	0.0744986	0.0738994	0.0410765	0.0603448	0.0612855	0.0497159	0.0577223	0.0732436	0.0770328	0.0777126	0.0609579	0.0588235	0.0829757	0.0738342	0.064194	0.0623229	0.0787966	0.0694444	0.0624093	0.0739726	0.0765027	0.08	0.0647887	0.0578279	0.103634	0.0838794	0.0875161	0.059744	0.0955056	0.0853147	0.0967742	0.0932642
76011	0.0568862	0.0426136	0.043956	0.0496241	0.0471698	0.0360963	0.0579937	0.0618067	0.0617647	0.0725926	0.0577465	0.0615183	0.0511696	0.0472441	0.0565217	0.0772727	0.0903614	0.0605613	0.0666667	0.0487805	0.056051	0.0807018	0.0512515	0.0657718	0.0690738	0.0671875	0.0878963	0.0787966	0.0718563	0.0794798	0.0804598	0.0672515
75155	0.0151515	0.0517241	0.057971	0.0625	0.0238095	0.0612245	0.0454545	0.0819672	0.0606061	0.0540541	0.0833333	0.0606061	0.0694444	0.0405405	0.0357143	0.0508475	0.131579	0.02	0.0142857	0.031746	0.078125	0.0217391	0	0.0810811	0.0327869	0.06	0.0163934	0.037037	0.0222222	0	0.0684932	0.0340909
75148	0.0655172	0.0302013	0.0344828	0.0898876	0.0666667	0.0559211	0.0392157	0.047619	0.0780142	0.0622711	0.0464286	0.0382979	0.0684932	0.040404	0.0218182	0.0442177	0.0616438	0.0519481	0.0383142	0.05	0.0777385	0.0727273	0.0888889	0.0616438	0.0588235	0.0717489	0.0401786	0.0366972	0.0437158	0.035533	0.0521327	0.0436681
76053	0.0705882	0.064951	0.0474537	0.0548571	0.0719041	0.0601685	0.0415677	0.0583016	0.0787037	0.0620347	0.0584795	0.0686275	0.0603248	0.0679012	0.0658049	0.0681293	0.0698225	0.0661058	0.0617978	0.0739348	0.0847458	0.0841751	0.0619785	0.0802395	0.0850515	0.0958005	0.0864619	0.100216	0.1	0.102833	0.0975057	0.103943
75149	0.0942529	0.0665921	0.0594595	0.0763723	0.0737355	0.0862182	0.0679612	0.0648929	0.0764099	0.0839161	0.0772669	0.08981	0.0827206	0.0811321	0.0711701	0.0930546	0.0957317	0.0771208	0.068255	0.0892508	0.0771746	0.0531629	0.0789474	0.0751073	0.0655967	0.064688	0.0813124	0.065097	0.0902778	0.0744681	0.0674505	0.0761485
75204	0.0727273	0.0536913	0.0434783	0.056872	0.0440529	0.0357942	0.0573566	0.0434783	0.0709534	0.0546875	0.0753425	0.0791209	0.0899358	0.0829694	0.0644444	0.0681818	0.0606061	0.0521542	0.0737327	0.0735632	0.0641975	0.0794297	0.0477387	0.0758427	0.0643678	0.0516432	0.0660592	0.058427	0.0706402	0.0951276	0.0657277	0.0860927
75218	0.0597738	0.08	0.0328407	0.0473282	0.0504451	0.0479339	0.0555556	0.0589226	0.058319	0.0511073	0.0533808	0.0722496	0.0914077	0.0684713	0.0661896	0.0689046	0.0639033	0.0759494	0.0723327	0.0689655	0.0690909	0.0858144	0.0620567	0.0654664	0.0699301	0.0490998	0.0564663	0.0645161	0.0728242	0.0627376	0.0607639	0.0675453
76651	0.0973451	0.0588235	0.0638298	0.0776699	0.0703125	0.0963855	0.158537	0.0454545	0.0833333	0.0506329	0.0594059	0.125	0.0941176	0.108434	0.0530973	0.125	0.11215	0.0714286	0.0384615	0.0679612	0.0833333	0.0545455	0.0574713	0.116883	0.046729	0.0645161	0.0347826	0.105263	0.0731707	0.0365854	0.0183486	0.042735
76043	0.0373134	0.0601504	0.0510949	0.0699301	0.0394737	0.0377358	0.0434783	0.0657895	0.0775862	0.0555556	0.0404624	0.0352941	0.0573248	0.0869565	0.04	0.0522876	0.0588235	0.075188	0.0638298	0.114504	0.0432432	0.0540541	0.0512821	0.0606061	0.0612245	0.0434783	0.0689655	0.0511364	0.0419162	0.0564972	0.0639269	0.0609756
75409	0.0646259	0.0594059	0.0315457	0.0909091	0.0402685	0.0440252	0.0919881	0.0341297	0.069378	0.0869565	0.0451613	0.0649895	0.0711864	0.0576923	0.0374532	0.0716511	0.0707692	0.0598592	0.0718563	0.0423453	0.0687285	0.0582822	0.03207	0.0685714	0.078534	0.0597826	0.0644391	0.0645161	0.059633	0.0853659	0.0770833	0.0769231
76023	0.0730594	0.0662983	0.0537634	0.0436893	0.0537634	0.0295858	0.0447761	0.0560345	0.0732759	0.0594059	0.0277778	0.0611354	0.0824176	0.0643275	0.0797872	0.0533981	0.0504587	0.0710059	0.0802469	0.0670391	0.0564972	0.0362694	0.0786517	0.0552147	0.0659341	0.0808081	0.0642202	0.047619	0.037037	0.0310881	0.046875	0.0598802
75042	0.0453608	0.0440075	0.0391007	0.0516717	0.0431034	0.0379009	0.0328542	0.0538302	0.0597015	0.0519099	0.0482759	0.0598456	0.0636943	0.0651014	0.0493827	0.0604099	0.0598739	0.0680507	0.0597484	0.0601852	0.0666667	0.0507559	0.0523504	0.0514469	0.072747	0.0561283	0.0568445	0.0501601	0.0712695	0.0683091	0.0685358	0.0450539
75165	0.0733262	0.0665927	0.0719499	0.0635091	0.0647249	0.0583419	0.0500982	0.0694586	0.0577105	0.0590674	0.0609137	0.0652174	0.0826772	0.0638075	0.0533463	0.0922131	0.0816929	0.0668081	0.0775428	0.079602	0.0756757	0.0723443	0.0877193	0.0685204	0.0705009	0.0715517	0.0808824	0.0632447	0.0679887	0.0679702	0.0752879	0.0644148
76115	0.0268199	0.0512367	0.0423453	0.053211	0.0560132	0.0593692	0.0411862	0.0460993	0.0831947	0.0448029	0.0569514	0.0851449	0.06814	0.0508197	0.0628931	0.0534224	0.0756844	0.0564103	0.047619	0.0528169	0.0776173	0.0414313	0.0612245	0.0545113	0.0746004	0.0860806	0.0918367	0.0603291	0.0875912	0.0964567	0.0684685	0.0610932
76060	0.0427807	0.0944444	0.0594595	0.0879121	0.0588235	0.0761905	0.0301508	0.0837438	0.0574163	0.08	0.0310881	0.115538	0.0828729	0.0724638	0.127451	0.0867052	0.0609137	0.0680851	0.0846561	0.0378378	0.047619	0.079602	0.0588235	0.0625	0.0698925	0.0892019	0.0780488	0.0655022	0.0869565	0.0643564	0.0758929	0.103627
75074	0.0526316	0.0518909	0.0542005	0.0646673	0.0726415	0.0587659	0.0664062	0.0909962	0.06778	0.0610687	0.0656146	0.0825503	0.063	0.0678497	0.0599813	0.075217	0.0755981	0.0659554	0.0635889	0.0589452	0.077472	0.0802292	0.0591767	0.0588235	0.0666041	0.0630372	0.0587649	0.0720803	0.0600572	0.0681818	0.0505515	0.0439462
75126	0.0631068	0.0442623	0.0441826	0.046875	0.0518732	0.0532081	0.0439093	0.0432277	0.0627675	0.0458599	0.053206	0.0696203	0.0689655	0.0594315	0.0481786	0.0534045	0.0630027	0.0621469	0.0571429	0.0704023	0.0690647	0.0415264	0.0502152	0.0515021	0.0534161	0.0412621	0.0605381	0.0608794	0.0522388	0.0549451	0.0435835	0.0634596
75050	0.0494071	0.0522006	0.037963	0.0483712	0.0433109	0.0464666	0.0384615	0.0417515	0.0589942	0.0740741	0.0596026	0.0648228	0.0534188	0.0525813	0.0389364	0.0597976	0.0701403	0.0693802	0.0472298	0.0679134	0.0749027	0.0593047	0.0681245	0.0577281	0.0644841	0.0578898	0.0737787	0.0647549	0.082013	0.0731707	0.066487	0.070018
76487	0.0793651	0.103448	0.0365854	0.0246914	0.0375	0.0487805	0.0493827	0.0547945	0.1125	0.0166667	0.0597015	0.105263	0.107692	0.130952	0.0641026	0.0666667	0.084507	0.108108	0.0923077	0.0645161	0.0344828	0.0909091	0.163265	0.0759494	0.109091	0.0606061	0.0895522	0.0833333	0.0212766	0.0617284	0.0298507	0.0714286
76040	0.0638978	0.0416048	0.0636364	0.0550847	0.0660225	0.0451128	0.0545723	0.0392442	0.0607735	0.0574163	0.0446686	0.0748299	0.080315	0.0684524	0.0455235	0.0880597	0.0747664	0.0633694	0.0495751	0.0735069	0.0742857	0.0781711	0.0678211	0.0737463	0.0944444	0.0584046	0.0803279	0.0710306	0.0645161	0.0707071	0.0599415	0.0979827
75124	0.0348837	0.0722222	0.0571429	0.0231214	0.0795455	0.039801	0.0654762	0.0493827	0.0432099	0.0359281	0.0584795	0.080402	0.0338983	0.0316456	0.0508475	0.0719424	0.0591716	0.0629371	0.025641	0.0487805	0.0512821	0.0967742	0.0467836	0.0388889	0.0265957	0.05	0.0722892	0.0391061	0.0534759	0.0635838	0.0331126	0.0689655
76066	0.0481928	0.0860215	0.0458716	0.0487805	0.0759494	0.0353982	0.0232558	0.0352941	0.0631579	0.0263158	0.019802	0.078125	0.0196078	0.0789474	0.0740741	0.0521739	0.128713	0.0253165	0.0491803	0.045977	0.0941176	0.0657895	0.0714286	0.0425532	0.0454545	0.04	0.0843373	0.0824742	0.0105263	0.0625	0.0918367	0.0816327
75454	0.0680272	0.037037	0.047619	0.0592593	0.0384615	0.0650407	0.026087	0.107692	0.0353535	0.0544218	0.0629371	0.0491803	0.0955882	0.059322	0.0522388	0.0604027	0.06	0.0560748	0.0920245	0.034965	0.0666667	0.0617284	0.0494505	0.102273	0.0621469	0.0689655	0.0845771	0.0456621	0.0564103	0.0740741	0.0613027	0.0653846
75150	0.0790081	0.0569307	0.060013	0.0637168	0.0682226	0.0674772	0.0518898	0.07	0.0732446	0.0715543	0.0677242	0.0862069	0.0852238	0.0822086	0.0840764	0.0697368	0.0785536	0.0773849	0.0614251	0.0770725	0.0758075	0.0541683	0.0654804	0.0747087	0.0614035	0.0659574	0.0772669	0.0724252	0.0737913	0.0902597	0.0689655	0.0743605
75201	0.06875	0.0359281	0.0681818	0.038961	0.0263158	0.0227273	0.0541872	0.0534759	0.0584795	0.0540541	0.0683761	0.045	0.0607477	0.038674	0.0357143	0.0425532	0.0691489	0.0945946	0.030303	0.0795455	0.0467836	0.0900474	0.0757576	0.0685714	0.0511628	0.0901639	0.0532787	0.0841584	0.071066	0.0873786	0.0548523	0.0943396
75022	0.0582524	0.0529801	0.0447284	0.0586319	0.0774648	0.0432277	0.0414013	0.046595	0.0725552	0.0731707	0.056962	0.0597345	0.0529595	0.0326087	0.0594406	0.057047	0.058309	0.0401338	0.0347222	0.0771605	0.1	0.0699301	0.0753425	0.0513595	0.0833333	0.0590062	0.0564784	0.0647059	0.0535117	0.0820669	0.0429043	0.0444444
75009	0.0753769	0.0636364	0.0431373	0.0726257	0.0517241	0.0518135	0.0380435	0.0487805	0.0633484	0.0555556	0.0600858	0.0434783	0.0724638	0.0702703	0.0502513	0.0609756	0.0421053	0.0520833	0.0706522	0.0753769	0.0860215	0.0643564	0.0655738	0.0963855	0.0982906	0.0472103	0.0627803	0.0484581	0.0378788	0.0534351	0.0289855	0.0452962
75019	0.0487013	0.0715447	0.0421394	0.0519481	0.05386	0.0587248	0.0576071	0.0532258	0.0559567	0.0408805	0.0675883	0.0751773	0.0693069	0.0565724	0.0565428	0.0597907	0.0721154	0.0617284	0.0559105	0.0520325	0.0544554	0.0723982	0.0603589	0.0450581	0.0577223	0.0589198	0.0632737	0.0678733	0.0808241	0.0678233	0.0570033	0.0608974
75207	0.0714286	0.0681818	0	0.0666667	0.0344828	0.0952381	0.130435	0.0645161	0.184211	0.08	0.0416667	0.0576923	0.205882	0	0.181818	0.037037	0	0.15625	0.0666667	0.0909091	0.0769231	0.0540541	0.142857	0.0740741	0.106383	0.075	0.176471	0.113636	0.194444	0.037037	0.05	0
75490	0.047619	0.0412371	0.0277778	0.0410959	0.0142857	0.0684932	0.0754717	0.0555556	0.0178571	0.0666667	0.056338	0.0491803	0.0545455	0.0461538	0	0.030303	0.0851064	0.0588235	0.0338983	0.0833333	0.0576923	0.0416667	0.0344828	0.0892857	0.102564	0.0465116	0.0875	0.0666667	0.0491803	0.0704225	0.0895522	0.0506329
76118	0.0564516	0.0697051	0.0514706	0.0697051	0.0482574	0.0626506	0.0835322	0.0598504	0.0818584	0.0802005	0.0806452	0.074	0.0569948	0.0544413	0.0812183	0.0675676	0.0619266	0.0785908	0.0546697	0.0943878	0.0752427	0.0581395	0.0772947	0.0818414	0.0530303	0.079602	0.0921986	0.0708861	0.0738916	0.0801887	0.100457	0.1
75028	0.0737606	0.0595084	0.0524899	0.0720607	0.0751232	0.0632111	0.0746835	0.0613333	0.0574866	0.0611702	0.057072	0.0956439	0.0708899	0.068314	0.0495553	0.0632754	0.0833333	0.060241	0.0315789	0.0463576	0.0583658	0.0775095	0.0717185	0.0786667	0.0747283	0.0824607	0.0735294	0.057554	0.0712329	0.0638821	0.0654912	0.0895334
75159	0.0716783	0.0565693	0.0572917	0.0727612	0.099631	0.0739372	0.0391156	0.0407767	0.0599251	0.0733788	0.0524412	0.0875	0.0859649	0.0613288	0.0343053	0.0784708	0.0862069	0.0680851	0.0683919	0.0688935	0.0739372	0.0389105	0.0568627	0.0641283	0.0451745	0.0886918	0.0516899	0.0766129	0.0705009	0.0748988	0.0784983	0.0513834
75209	0.0621622	0.027027	0.0697674	0.0613811	0.0469613	0.0560976	0.0588235	0.0391645	0.0658228	0.0290698	0.0521978	0.0719424	0.0625	0.0588235	0.0685714	0.060423	0.0515759	0.0460526	0.0253968	0.0483871	0.0552486	0.0631868	0.0611621	0.0383562	0.0664894	0.0806916	0.0640244	0.0329949	0.0539846	0.0751445	0.0561497	0.0648649
76164	0.0625	0.0406977	0.0466926	0.0445344	0.0342466	0.0641892	0.0286624	0.0348525	0.0740741	0.0461957	0.0369318	0.0383632	0.048913	0.0572207	0.0334262	0.0353261	0.0596206	0.0351906	0.0454545	0.0487805	0.0600962	0.037037	0.0356164	0.0461957	0.0640669	0.059322	0.0469613	0.0579345	0.0811518	0.077135	0.0582011	0.0868486
76012	0.054321	0.0465426	0.0417957	0.0513834	0.0608696	0.0750341	0.0569307	0.0603774	0.0666667	0.0695122	0.0567537	0.0692149	0.0876777	0.0626566	0.0724044	0.0646438	0.084507	0.0976514	0.0617978	0.0789474	0.0772304	0.101955	0.0749682	0.0816327	0.100817	0.0971867	0.105915	0.0734908	0.0850299	0.0725	0.0901857	0.0757381
76179	0.0557342	0.056338	0.0557308	0.0649215	0.056338	0.0585774	0.0535895	0.0656371	0.0703606	0.0673666	0.0633245	0.0769928	0.0787704	0.052808	0.0693257	0.0717264	0.0924062	0.0821918	0.0707162	0.0652952	0.080573	0.06469	0.0575342	0.0674157	0.0862989	0.0952381	0.0818859	0.072337	0.0969345	0.0918367	0.0762987	0.0696784
75234	0.0681551	0.0641774	0.0528967	0.0558859	0.0629012	0.0604982	0.0546117	0.0622711	0.0627962	0.0650814	0.045721	0.0755124	0.0763636	0.0562874	0.0588235	0.0547196	0.056	0.0747549	0.0665163	0.0762032	0.0829146	0.0718232	0.0428212	0.0589595	0.0555556	0.0726531	0.0587248	0.0567901	0.0705394	0.0626935	0.0668277	0.0508333
75203	0.0605428	0.0693069	0.0753968	0.0512334	0.0581655	0.036961	0.0529532	0.0690377	0.0684932	0.0546218	0.0454545	0.0598086	0.0729614	0.0523691	0.0636792	0.0468384	0.0840708	0.0891892	0.0726392	0.0692124	0.0593824	0.0974359	0.0585859	0.0804598	0.0606936	0.0599455	0.0780781	0.0749465	0.0819672	0.0849057	0.0694737	0.0695444
76205	0.0862471	0.0594714	0.0564334	0.0967742	0.0701031	0.0531401	0.0522876	0.056701	0.0949074	0.0646766	0.0702948	0.0954617	0.0751174	0.081448	0.0702948	0.0702479	0.0547046	0.0550847	0.0548246	0.0695067	0.0641822	0.0923077	0.093617	0.0655391	0.0882353	0.0731707	0.0769231	0.0709534	0.0899123	0.102616	0.0799087	0.067757
75067	0.0593668	0.0528053	0.0453686	0.0685197	0.0632762	0.0623875	0.0549937	0.0557335	0.0666252	0.0517799	0.0436709	0.0578647	0.0655308	0.0580475	0.0528999	0.0569659	0.0713838	0.0491415	0.0404762	0.0570571	0.0627692	0.0675	0.0580225	0.0547863	0.0808143	0.0630172	0.0518987	0.0599388	0.0521173	0.0586767	0.0623853	0.0613052
75228	0.0594758	0.0525101	0.0456778	0.0564944	0.0497512	0.0572687	0.0536513	0.0636456	0.0698475	0.0374368	0.0630841	0.0753745	0.0809012	0.0687373	0.0638298	0.0708622	0.0782563	0.0544768	0.0628834	0.0488133	0.0641604	0.0616562	0.0653195	0.074846	0.0873735	0.078803	0.0839734	0.0744625	0.0827108	0.0734341	0.0739979	0.0721703
76120	0.0638978	0.0745856	0.0505618	0.0895062	0.101408	0.0597826	0.0875912	0.065	0.104225	0.0874317	0.0679612	0.0702179	0.0857143	0.0560748	0.0619048	0.0671642	0.097852	0.0650602	0.0733496	0.0802603	0.0946602	0.0917031	0.0884956	0.101562	0.0907029	0.109489	0.0912863	0.0737705	0.133479	0.100962	0.0864745	0.0988806
75479	0.0186916	0	0.0243902	0.0410959	0.0149254	0	0.0344828	0.03125	0.038961	0.015625	0.0434783	0.0333333	0.0196078	0.0434783	0.02	0.0307692	0.0363636	0.0638298	0.0188679	0.0819672	0.0357143	0.0666667	0.0357143	0.0882353	0.0694444	0.0555556	0.0925926	0.0555556	0.0677966	0.0535714	0.104478	0.03125
75220	0.028128	0.0267857	0.0341644	0.0346399	0.0438413	0.0295567	0.0327869	0.0377003	0.0483559	0.0456349	0.0377176	0.0450704	0.0443182	0.045354	0.0428571	0.045977	0.0363423	0.0454545	0.0462555	0.045292	0.0486284	0.0420272	0.0421166	0.0513347	0.0567376	0.0546318	0.0461165	0.0609613	0.0464576	0.0521437	0.0448239	0.0553746
75104	0.0683417	0.0675105	0.0769231	0.0856031	0.0648703	0.0574949	0.0759878	0.0671206	0.0901961	0.0933893	0.0778564	0.0669111	0.0670051	0.0732883	0.0685204	0.0642378	0.0745098	0.0596562	0.0503202	0.0583874	0.0736264	0.0729387	0.0502326	0.0740741	0.0704935	0.0993117	0.0649215	0.0804924	0.0924623	0.0788072	0.0881489	0.0746812
75048	0.0371287	0.0616114	0.0388128	0.0551559	0.0422886	0.0559611	0.0392157	0.0347395	0.0520833	0.0324074	0.0653595	0.0592255	0.0513514	0.0391198	0.0551378	0.0601504	0.0663717	0.0588235	0.0536481	0.0400943	0.0653409	0.0603015	0.0423163	0.0645161	0.0554156	0.0438799	0.0383747	0.0748899	0.0751708	0.0570825	0.0506073	0.036961
76233	0.0208333	0.0168067	0.0350877	0.0162602	0.0442478	0.100917	0.0592593	0.0603448	0.0943396	0.0330579	0.0681818	0.0545455	0.0721649	0.0652174	0.0366972	0.00909091	0.0535714	0.0543478	0.0574713	0.0674157	0.0394737	0.0365854	0.0337079	0.03	0.0693069	0.0932203	0.0384615	0.0449438	0.0294118	0.031746	0.0642202	0.0891089
76239	0.0238095	0.0238095		0				0.0857143		0.0357143	0.0333333	0.047619	0.0857143	0.03125		0.0344828	0.0444444	0.0645161	0.0384615	0.1		0			0.0869565		0.0540541	0.0833333		0.0740741		0.0277778
76259	0.025641	0.09	0.0693069	0.0747664	0.0555556	0.0508475	0.025	0.0882353	0.110236	0.115385	0.0471698	0.109677	0.0777778	0.0797101	0.0909091	0.0776699	0.0615385	0.115044	0.130841	0.12605	0.0928571	0.0992366	0.0507246	0.0544218	0.0827068	0.0392157	0.078125	0.08	0.08	0.0782609	0.0758621	0.110345
76252	0.0294118	0.0117647	0.027027	0.0298507	0.04	0.0307692	0.0277778	0.0350877	0.031746	0	0.0517241	0	0.0555556	0.114754	0.0338983	0	0.03125	0	0	0	0	0.0204082	0.0149254	0.0517241	0.0204082	0.0176991	0.0138889	0	0.0133333	0.0410959	0.0138889	0.0298507
75214	0.0552147	0.0429515	0.04102	0.0444191	0.053653	0.0581818	0.0461712	0.0499419	0.0576471	0.0364964	0.0538847	0.0586283	0.0524345	0.0688807	0.0589595	0.0385542	0.0497512	0.0457064	0.0460948	0.0521212	0.0615942	0.0587484	0.0691421	0.0715096	0.0491607	0.0544489	0.0558252	0.0752688	0.0655542	0.0691421	0.0504414	0.0623557
75215	0.0816044	0.0875332	0.0644217	0.0910494	0.0927978	0.0751534	0.0980684	0.091195	0.081761	0.08726	0.0924499	0.0734558	0.112795	0.0903328	0.096248	0.112605	0.0905861	0.107468	0.0625	0.116279	0.10473	0.092437	0.0893471	0.0991597	0.108333	0.0984456	0.101498	0.104615	0.123267	0.118936	0.0995106	0.100855
76248	0.0497057	0.0469121	0.0429082	0.0456647	0.0509287	0.051609	0.0495716	0.0565569	0.0755355	0.0624648	0.0510272	0.0567164	0.057393	0.0654506	0.0332262	0.04561	0.0703746	0.0639053	0.0631443	0.0662577	0.0538642	0.0620783	0.0529891	0.0802632	0.0688141	0.0751043	0.0630372	0.0725034	0.0807692	0.0635135	0.0563003	0.0719895
76065	0.0693431	0.0808824	0.0673401	0.0615385	0.106145	0.0673575	0.0500782	0.0876289	0.0718563	0.0714286	0.0662461	0.0745814	0.0655738	0.0672131	0.065449	0.0770349	0.0687679	0.0757801	0.0647249	0.0743671	0.0534759	0.0794913	0.0741325	0.0610119	0.0580552	0.070901	0.0392442	0.0565517	0.0834455	0.0663781	0.0644699	0.0819022
76052	0.05	0.029304	0.0408163	0.0318725	0.0535714	0.0604982	0.029703	0.0740741	0.0623053	0.0592105	0.0698413	0.070122	0.0571429	0.0332226	0.0418118	0.042623	0.0611511	0.0692042	0.0630631	0.0603175	0.0597484	0.0652921	0.0443787	0.0710383	0.0909091	0.0701754	0.077957	0.0786517	0.0707071	0.0572207	0.0616438	0.062201
76017	0.0634006	0.0585413	0.0560081	0.0525822	0.0612245	0.0520833	0.0561798	0.071875	0.0783582	0.0688995	0.0642458	0.0518946	0.0617678	0.0642023	0.0543071	0.0655577	0.0709291	0.08143	0.060757	0.07109	0.0514166	0.0692008	0.0666667	0.0635551	0.0765358	0.0860215	0.0546392	0.0738074	0.0628684	0.0641953	0.0748815	0.063447
76645	0.0527307	0.0532151	0.0761317	0.0501859	0.046332	0.0521921	0.0514019	0.044586	0.0283843	0.0656455	0.0619835	0.0484211	0.0637363	0.0459519	0.0434783	0.0748899	0.0506912	0.0481013	0.0422833	0.045045	0.075	0.0682415	0.0477612	0.0694444	0.0664894	0.0652819	0.0985915	0.12	0.104235	0.0970588	0.084399	0.114706
75252	0.0418327	0.04	0.0524194	0.0554415	0.0411765	0.0448343	0.0438413	0.0721868	0.0655106	0.0440882	0.0542495	0.0629032	0.062753	0.0689046	0.039783	0.0448598	0.082495	0.0708661	0.0678899	0.0726496	0.0549898	0.0487805	0.0408922	0.0651261	0.0656934	0.054902	0.045045	0.0565693	0.0485612	0.0647359	0.0834725	0.0529101
76109	0.0458333	0.0641822	0.0475248	0.0492505	0.0480962	0.058	0.0477223	0.061086	0.0647948	0.0555556	0.0712788	0.0971223	0.0907216	0.0889749	0.0594059	0.0603113	0.0670732	0.0847458	0.0649652	0.0705394	0.0702403	0.101512	0.0726141	0.0587045	0.0783848	0.0870536	0.0818182	0.0942623	0.076	0.0812641	0.0878661	0.0795699
76691	0.0460526	0.0561798	0.0506329	0.0350877	0.0466321	0.0248447	0.0449438	0.0473684	0.0685714	0.0444444	0.0641026	0.068323	0.0689655	0.0408163	0.0316456	0.0309278	0.0512821	0.0506329	0.0496894	0.0459184	0.0434783	0.0529801	0.0628931	0.0567376	0.0426829	0.0649351	0.0785714	0.0816327	0.0743802	0.0758621	0.0595238	0.0740741
76051	0.0651934	0.0491266	0.0557377	0.0498866	0.0608519	0.0466667	0.0433815	0.0546697	0.0475207	0.0473628	0.0549944	0.062975	0.0549569	0.0680346	0.0506198	0.0672976	0.0529279	0.0568445	0.0572473	0.0725108	0.0525762	0.0663812	0.0507937	0.0488842	0.0530973	0.0665236	0.0579065	0.0657895	0.0766088	0.0603622	0.0487805	0.0617512
76626	0.0188679	0.116279	0.05	0.0943396	0.02	0.0769231	0.0416667	0.0566038	0.0307692	0.0681818	0.0196078	0.108696	0.0754717	0.0517241	0.0425532	0.0384615	0.0338983	0.0666667	0.0677966	0.0454545	0.0425532	0.0769231	0.0943396	0.04	0.0444444	0.04	0.05	0	0.111111	0.0566038	0.025	0.0322581
76058	0.0656371	0.0665323	0.0566406	0.071298	0.0964567	0.0436187	0.059246	0.0759013	0.0661017	0.0613861	0.0778986	0.0718039	0.0877797	0.100649	0.0826772	0.0894454	0.0888469	0.0909091	0.0784641	0.0945946	0.0692884	0.0730769	0.0660194	0.0890538	0.108808	0.102967	0.0942761	0.0805921	0.0961145	0.1002	0.104553	0.103873
76059	0.0970149	0.106509	0.101695	0.0726257	0.0363636	0.0787879	0.0538922	0.0546448	0.081761	0.0580645	0.0718563	0.0662252	0.0679012	0.142857	0.0925926	0.11465	0.044586	0.0661765	0.120567	0.0424242	0.0719424	0.0581395	0.0833333	0.0958904	0.0786517	0.117318	0.124324	0.0909091	0.117318	0.100629	0.147059	0.121951
75238	0.0666667	0.0505051	0.0601966	0.0624264	0.0652432	0.0556995	0.0380184	0.0589023	0.0611735	0.0733173	0.0548628	0.0557452	0.0752688	0.0605701	0.0545906	0.0536353	0.0613636	0.05375	0.0548112	0.0720621	0.0504305	0.0674157	0.0633214	0.0696279	0.0689252	0.0632911	0.0679502	0.0861467	0.0854392	0.0729412	0.0607477	0.0627907
75125	0.0819672	0.119318	0.0497512	0.0654206	0.0893855	0.0461538	0.047619	0.0869565	0.0544554	0.08	0.073913	0.0686275	0.0904762	0.0567376	0.057971	0.0914634	0.0777202	0.0949721	0.0584795	0.0662651	0.1	0.0925926	0.0828402	0.0588235	0.107784	0.0645161	0.039548	0.0674847	0.0769231	0.0636943	0.0454545	0.0693069
76064	0.0731707	0.0697674	0.0681818	0.0487805	0.0810811	0.0576923	0.0526316	0.0181818	0.115385	0.0789474	0.107143	0.0909091	0	0.125	0.117647	0.0377358	0.0769231	0.0638298	0.0612245	0.06	0.0862069	0.0416667	0	0.132075	0.108696	0.122449	0.106383	0.056338	0.0909091	0.211538	0.125	0.0377358
76071	0.0598291	0.039604	0.0588235	0.0120482	0.05	0.038835	0.049505	0.0695652	0.0884956	0.105769	0.0465116	0.0943396	0.0412371	0.0458716	0.0192308	0.091954	0.0879121	0.0530973	0.0754717	0.0291262	0.030303	0.0555556	0.047619	0.027027	0.080292	0.0588235	0.0930233	0.102804	0.0254237	0.0992366	0.0703125	0.0733945
76073	0.04	0.0534351	0.0479452	0.0470588	0.0204082	0.0470588	0.0510949	0.01875	0.0506329	0.0837989	0.0860927	0.102564	0.0697674	0.0413793	0.0805369	0.0366972	0.0847458	0.0656934	0.0285714	0.0580645	0.0487805	0.0416667	0.0935252	0.0245902	0.0178571	0.0810811	0.10084	0.0620155	0.0533333	0.0764706	0.0512821	0.0448718
76049	0.0670927	0.0543319	0.0559647	0.0675883	0.0689655	0.0663717	0.0531915	0.0664653	0.102134	0.0809372	0.0741351	0.0761773	0.0757143	0.0674319	0.0647709	0.048855	0.0678733	0.0658106	0.0594228	0.0470219	0.0666667	0.0486111	0.05547	0.0491329	0.0677749	0.0668524	0.067602	0.0698577	0.0671141	0.0724816	0.0486787	0.0520694
75211	0.0390977	0.04408	0.0319258	0.0522972	0.0590062	0.0493066	0.0443401	0.0412917	0.0479705	0.0452183	0.044629	0.0433404	0.0537751	0.0545359	0.0391616	0.0429415	0.0497367	0.0449302	0.0405251	0.0421478	0.0381634	0.0495868	0.0455581	0.0539629	0.0479781	0.0487455	0.0466073	0.0518331	0.057888	0.0464968	0.0500294	0.0625
75208	0.0451977	0.0467391	0.0326577	0.0499469	0.0481144	0.0558859	0.0377834	0.0448485	0.0432173	0.0456227	0.0406699	0.0474537	0.0480405	0.0541205	0.0452436	0.0490431	0.0524246	0.0517241	0.040293	0.0482399	0.0543767	0.0650636	0.0343461	0.0437666	0.0514372	0.0536513	0.0539683	0.0545977	0.0610465	0.0613208	0.0481541	0.0715397
76050	0.0588235	0.0512821	0.0979381	0.113861	0.0926829	0.101064	0.0625	0.0628019	0.0677966	0.0363636	0.0810811	0.0456853	0.114286	0.0491803	0.0441176	0.0757576	0.108434	0.084507	0.0471204	0.0876289	0.0698925	0.0666667	0.05	0.0462428	0.115385	0.103286	0.0977778	0.069869	0.134884	0.0858896	0.0761421	0.0777202
76262	0.0558882	0.0381526	0.0558767	0.0673469	0.055794	0.0569745	0.0645161	0.0533088	0.0734767	0.053407	0.0610687	0.0786713	0.0686456	0.0623853	0.0463918	0.0756303	0.0671256	0.0442177	0.043131	0.0508475	0.0580431	0.0535406	0.0641892	0.0631068	0.0469256	0.0685805	0.0496894	0.047041	0.0612245	0.0612245	0.0465753	0.0778523
76055	0.0890411	0.0322581	0.0814815	0.0619469	0.0620155	0.0869565	0.0761905	0.0416667	0.0833333	0.0925926	0.0546875	0.0535714	0.07	0.0714286	0.0898876	0.0549451	0.113636	0.0761905	0.0545455	0.0273973	0.0582524	0.0520833	0.0612245	0.0416667	0.105263	0.0875	0.0987654	0.043956	0.0779221	0.0869565	0.0654206	0.075
76270	0.0344828	0.0253165	0.0434783	0.05	0.0895522	0.08	0	0.122449	0.108696	0.107692	0.0263158	0.04	0.0961538	0.0196078	0.0961538	0.0377358	0.0909091	0.0338983	0.0491803	0	0.0136986	0.112676	0.0746269	0.0178571	0	0.0769231	0.0212766	0.06	0.0377358	0.0465116	0.0350877	0.0512821
75231	0.0549738	0.0415945	0.0346577	0.0418216	0.0470914	0.0501022	0.0429072	0.0515021	0.0582348	0.0554455	0.0505051	0.0785297	0.0712195	0.056137	0.0655106	0.0671343	0.0704225	0.0658307	0.0518192	0.0627973	0.0695397	0.0522466	0.0629235	0.0777251	0.0678466	0.0905473	0.0720632	0.0671937	0.0715631	0.0924623	0.0718391	0.0802292
75452	0.0425532	0.0851064	0.0461538	0.0416667	0.0647482	0.0707965	0.0909091	0.0423729	0.0264901	0.10084	0.10101	0.0486486	0.0854701	0.04	0.0932203	0.047619	0.0675676	0.0472441	0.0789474	0.0542636	0.0225564	0.0291262	0.0350877	0.0225564	0.0681818	0.0733333	0.0769231	0.108108	0.0503597	0.0204082	0.05	0.0300752
75229	0.0516373	0.0391645	0.0415677	0.0562092	0.053961	0.0412903	0.043038	0.0453972	0.0503067	0.0524934	0.0485437	0.06974	0.0678363	0.0544041	0.0588235	0.0564103	0.0618421	0.0553936	0.0708861	0.0570292	0.0669456	0.0515604	0.0524246	0.0411985	0.0401146	0.049435	0.0654339	0.0648148	0.0671756	0.0482456	0.0535211	0.0736342
75423	0.107143	0.0722892	0.0326087	0.0470588	0.0326087	0.0515464	0.03	0.0133333	0.111111	0.06	0.0121951	0.0982143	0.0625	0.09375	0.015873	0.025974	0.0649351	0.0377358	0.0294118	0.125	0.047619	0.0309278	0.0289855	0.0704225	0.102041	0.0294118	0.0470588	0.0357143	0.0430108	0.0625	0.134146	0.0714286
75496	0.0384615	0.0545455	0.0620155	0.0265487	0.0619469	0.0701754	0.0769231	0.0676692	0.0782609	0.0165289	0.0357143	0.0588235	0.0409836	0.111111	0.0666667	0.0648148	0.0707071	0.0652174	0.0740741	0.0428571	0.10101	0.0641026	0.0510204	0.153846	0.0344828	0.0842105	0.0679612	0.0666667	0.0487805	0.0679612	0.0595238	0.0416667
75225	0.0608229	0.0520231	0.0487805	0.0310786	0.0631579	0.0683112	0.0516252	0.0387454	0.0635514	0.0504854	0.0538922	0.0895522	0.0587121	0.0779221	0.0749465	0.0622711	0.0514184	0.0772358	0.040856	0.0512295	0.0483193	0.0756646	0.0419847	0.042885	0.0625	0.0676533	0.0616438	0.0668016	0.0530786	0.0807453	0.0681818	0.0584551
75227	0.0641892	0.0577547	0.0438769	0.0547667	0.0641283	0.0485883	0.0506781	0.0487475	0.0495119	0.0746073	0.0371517	0.05623	0.0522876	0.0454545	0.0525961	0.0527009	0.0762771	0.0587393	0.0569878	0.05828	0.0747331	0.0594059	0.0624071	0.0647431	0.0626844	0.068708	0.0501718	0.0665281	0.0685028	0.0793763	0.0666223	0.0640362
76652				0	0.178571	0.0232558	0.0789474	0.047619	0.125	0.114286	0.0857143	0.1		0.09375	0.0555556	0.0731707	0.03125	0	0.0625		0.0425532	0.097561	0.0857143			0.115385	0	0.025641	0.0238095	0.0666667	0.166667	0.121951
76476	0.109756	0.0454545	0.0175439	0.15625	0.0543478	0.037037	0.0655738	0.106061	0.08	0.05	0.0377358	0.145455	0.0816327	0.0566038	0.0441176	0.0731707	0.0483871	0.05	0.0454545	0.0983607	0.016129	0	0.109091	0.0909091	0.0892857	0.150943	0.0340909	0	0.0666667	0.0405405	0.0447761	0.0307692
76670	0	0.0344828	0.0526316	0.0285714	0.0697674	0.0454545	0.151515		0.166667	0.025641	0.0652174	0.0606061	0.0555556	0.0333333	0.0294118	0.0243902	0.0833333	0.0416667	0.0208333	0.0526316	0.037037	0.0882353	0.0487805	0.0851064	0.0526316	0.0571429	0.03125	0.0227273	0	0.09375	0.0487805	0.111111
76462	0.123596	0.0410959	0.0657895	0.0666667	0.128571	0.0405405	0.046875	0.0263158	0.0987654	0.101266	0.0138889	0.038961	0.0769231	0.0735294	0.0277778	0.0694444	0.025974	0.0571429	0	0	0.0434783	0.0447761	0.0769231	0.09375	0.038961	0.0434783	0.0615385	0.0645161	0.057971	0.0980392	0.031746	0.0140845
76639	0.0175439	0.179104	0.0566038	0.0877193	0.0363636	0.0181818	0.0166667	0.0508475	0.0576923	0.0517241	0.101695	0.0735294	0.0338983	0.0526316	0.0727273	0.0483871	0.0819672	0.06	0.0408163	0.0447761	0.0769231	0.0441176	0.0483871	0.0645161	0.0638298	0	0.0882353	0.0227273	0.142857	0.0196078	0.1	0.0731707
76671	0.0483871	0.0571429	0.0153846	0.0238095	0.0666667	0.0847458	0.0862069	0.153846	0.0535714	0.136364	0.0377358	0.0625	0.0483871	0.025641	0.025	0.047619	0.04	0.0208333	0.125	0.0273973	0.0392157	0.0652174	0.111111	0.0344828	0.181818	0.0666667	0.0517241	0.122449	0.0434783	0.0185185	0.0588235	0.12963
76679	0.0638298	0.08	0.0625	0.0754717	0.0714286	0	0.0217391	0.0961538	0.0882353	0.0285714	0.031746	0.0425532	0.030303	0.0877193	0	0.0540541	0	0.047619	0.0350877	0.04	0.0735294	0.0571429	0.0185185	0.0517241	0.0487805	0	0.0967742	0.03125	0	0.0652174	0.0606061	0.0512821
75232	0.0875274	0.0877551	0.0658617	0.0921502	0.0862832	0.0711207	0.0800439	0.0726073	0.0901468	0.0871795	0.0705065	0.0778443	0.0793839	0.09101	0.0786638	0.093076	0.088267	0.0746606	0.0741971	0.0604651	0.0587002	0.0836653	0.0926554	0.0889349	0.0957944	0.0943168	0.0942721	0.0767613	0.0982533	0.0948478	0.107987	0.0919305
75236	0.053125	0.0851648	0.0750605	0.076555	0.0890585	0.0782396	0.0555556	0.0798817	0.0829016	0.0896739	0.0335196	0.038835	0.0813648	0.037234	0.0776942	0.0694087	0.0704607	0.0896359	0.0739726	0.0648649	0.066313	0.0856423	0.0661939	0.103359	0.0765306	0.0898551	0.0864865	0.0771429	0.101983	0.0868421	0.0813648	0.0741758
75038	0.0429752	0.0541455	0.0332278	0.0419255	0.0344234	0.0252765	0.0211382	0.0287356	0.0502513	0.0409165	0.0547112	0.0585938	0.0514184	0.0418944	0.031746	0.0481752	0.0606557	0.0551053	0.0356564	0.0477707	0.042735	0.0505529	0.0550918	0.0603175	0.0642055	0.0541353	0.0507692	0.0451011	0.0566929	0.0402385	0.035061	0.041791
75418	0.043131	0.0389171	0.0285205	0.033101	0.0310345	0.0392562	0.0442804	0.0333333	0.047259	0.0465587	0.0445434	0.049896	0.0456621	0.044186	0.0453461	0.0629213	0.0566502	0.0461165	0.034398	0.0441989	0.0437018	0.0481283	0.0404762	0.0651042	0.0373281	0.0601942	0.0797414	0.0521042	0.0864979	0.0657371	0.038817	0.0813187
75248	0.0592992	0.0612245	0.0411523	0.0558313	0.0657534	0.0633894	0.0527778	0.0606827	0.0560626	0.0610048	0.0540881	0.0642424	0.0526992	0.0492866	0.0388889	0.0595238	0.0615764	0.0709046	0.0344403	0.0531915	0.064803	0.0396825	0.0482234	0.0674157	0.0613839	0.0519324	0.0768307	0.0486111	0.0656682	0.0548425	0.0525701	0.0609481
75407	0.0975057	0.0935961	0.0604167	0.0962963	0.0868545	0.0847059	0.067757	0.0638298	0.0722689	0.0675325	0.0555556	0.0514706	0.0556901	0.0698925	0.0382775	0.0521327	0.0921053	0.0890869	0.0579345	0.0844749	0.0742358	0.0478261	0.0720339	0.0607477	0.0774908	0.095339	0.0576923	0.0623886	0.0863039	0.0866935	0.0855705	0.0958188
75401	0.0691193	0.0650888	0.0404624	0.0552291	0.0608496	0.0554245	0.0373599	0.0699301	0.0567633	0.0471822	0.0571809	0.0515873	0.0565553	0.0480769	0.0473186	0.0624049	0.037448	0.0625869	0.0310192	0.0449438	0.0530822	0.0427632	0.0414201	0.0534224	0.0615385	0.0651085	0.0496124	0.0591133	0.048105	0.0456693	0.0634921	0.0486656
75253	0.0664062	0.0595238	0.0506567	0.0529801	0.0623819	0.0782123	0.0536673	0.0699153	0.0836576	0.0961924	0.083779	0.0767974	0.0870445	0.0938124	0.068	0.101761	0.107143	0.088172	0.0662651	0.062753	0.0790598	0.0486556	0.0635965	0.0767544	0.0947137	0.0690377	0.0705645	0.0749064	0.0949612	0.0657194	0.0636183	0.0685185
75247	0.0769231	0.0421053	0.0892857	0.05	0.104762	0.0517241	0.0543478	0.1	0.0410959	0.0684932	0.0689655	0.0864198	0.047619	0.0721649	0.0574713	0.11	0.0632911	0.0875	0.0352941	0.0963855	0.0947368	0.03	0.0821918	0.0970874	0.142857	0.104762	0.0849057	0.1	0.112069	0.0636364	0.0769231	0.0756303
75070	0.0538462	0.0559211	0.0473104	0.0625	0.0572988	0.0608108	0.0489237	0.0689437	0.0595238	0.0503876	0.0573394	0.052381	0.0608696	0.0609244	0.0425388	0.0543346	0.0595164	0.0494438	0.0448296	0.0626999	0.0654384	0.0566502	0.0520468	0.0735562	0.0626781	0.0543789	0.0562895	0.048468	0.0566461	0.0638978	0.0513896	0.0581088
75056	0.0953912	0.0648352	0.0649627	0.0864055	0.0718391	0.0743889	0.061651	0.0567515	0.0822222	0.0835882	0.068097	0.0703883	0.0689655	0.078453	0.0739979	0.0742227	0.0664653	0.0626223	0.0588235	0.0783262	0.0857143	0.0778443	0.0785441	0.077748	0.088632	0.0650943	0.0687679	0.0577617	0.0811321	0.0721554	0.057676	0.0804196
75057	0.0785498	0.0302115	0.0571429	0.0448718	0.0798817	0.0422078	0.0517241	0.0736196	0.0422078	0.0771605	0.0347826	0.0591497	0.0774194	0.0539568	0.0679612	0.0457143	0.0660661	0.0437318	0.0397878	0.0833333	0.0501475	0.0678466	0.0503145	0.0590062	0.0762712	0.0429799	0.0485175	0.0485714	0.0672043	0.0485175	0.048433	0.0812325
75154	0.0828604	0.0698795	0.05	0.0743902	0.076537	0.0886228	0.0542099	0.0781991	0.0696864	0.0812121	0.0607143	0.0783848	0.077193	0.0791527	0.0736127	0.0759494	0.0857143	0.0846868	0.0763723	0.0655941	0.0679012	0.0678392	0.0628079	0.0727924	0.0685096	0.080148	0.082774	0.075188	0.0729761	0.0726073	0.0687104	0.082774
75068	0.0552326	0.0476839	0.0431849	0.0754017	0.0506494	0.0650407	0.0591472	0.0679012	0.0694444	0.0664962	0.0662324	0.0758557	0.0801887	0.0625	0.0570388	0.0627907	0.0666667	0.0804598	0.0589681	0.0606407	0.0814815	0.0889603	0.0595483	0.0723489	0.0735608	0.0674264	0.0604089	0.0609645	0.0790843	0.0774379	0.0588794	0.0626703
75459	0.0666667	0.0610687	0.0428571	0.0642202	0.0866142	0.0645161	0.0847458	0.0526316	0.0409836	0.034188	0.0813008	0.047619	0.0671642	0.0608108	0.0526316	0.0446429	0.0265487	0.0206186	0.0725806	0.0620155	0.0471698	0.0521739	0.0263158	0.0687023	0.0736842	0.0964912	0.0854701	0.131313	0.0980392	0.0787402	0.0503597	0.101852
76209	0.0676471	0.077266	0.0624093	0.0651852	0.0838509	0.0463097	0.0546075	0.0778816	0.0795455	0.091047	0.0728682	0.0981595	0.0515298	0.0507132	0.0540123	0.072327	0.0637982	0.0546022	0.0468278	0.0520674	0.0852018	0.10177	0.0811209	0.0789116	0.0810398	0.085906	0.0946292	0.100785	0.0931232	0.0900763	0.07375	0.0771558
76018	0.0539033	0.0632689	0.0351201	0.0412541	0.0589286	0.0505226	0.045614	0.0479574	0.0544465	0.0751748	0.0700152	0.0873786	0.0728242	0.0613718	0.0479846	0.0657194	0.0803059	0.0742188	0.0696095	0.0718133	0.0552677	0.0592105	0.0607735	0.0628272	0.0729927	0.0719844	0.0487805	0.0618182	0.0537634	0.0634921	0.0594796	0.0755064
76226	0.0433526	0.0487805	0.0619469	0.0408719	0.0588235	0.0303867	0.0276074	0.0608974	0.0547112	0.0507463	0.0507614	0.0547046	0.0498442	0.0924855	0.0466667	0.0356083	0.0460123	0.042735	0.0656566	0.0588235	0.0650407	0.0632184	0.065445	0.0697674	0.0531401	0.0728155	0.0757238	0.0567376	0.05	0.0627803	0.0707547	0.0580645
75206	0.0559254	0.0462185	0.0361446	0.0402985	0.0362538	0.0403101	0.0278638	0.0584518	0.0547504	0.0434109	0.0395137	0.0500695	0.0509868	0.0491329	0.0437406	0.0411523	0.0510836	0.0576324	0.0579937	0.0579915	0.0594855	0.0479876	0.0515759	0.0540541	0.0483092	0.0459966	0.0419708	0.0438449	0.0608553	0.047541	0.066358	0.0703593
75093	0.0532276	0.0409556	0.0387244	0.0524434	0.0364706	0.0528169	0.0617284	0.0480349	0.0570776	0.0750293	0.0559361	0.0611855	0.0711009	0.0527607	0.0676329	0.0653153	0.0774908	0.0601336	0.0649485	0.0541475	0.0756193	0.0754936	0.0682081	0.0630011	0.0652681	0.0655527	0.0550996	0.0506912	0.0646298	0.0806452	0.0490928	0.0653595
75180	0.0871863	0.0859788	0.0843882	0.0888291	0.0886571	0.0772472	0.0869565	0.0818308	0.0672515	0.0829817	0.0585774	0.110305	0.0979592	0.090379	0.0791946	0.0740741	0.0900277	0.0676923	0.0605613	0.0464744	0.0811639	0.0536131	0.082391	0.0831974	0.0571429	0.0652529	0.0564103	0.0550314	0.0808241	0.0801187	0.0705036	0.101955
76108	0.0678466	0.062439	0.0607843	0.0558229	0.0637168	0.0648236	0.069723	0.0805687	0.0892226	0.0832554	0.0704483	0.0889796	0.0924214	0.0798611	0.0761374	0.0761736	0.0895954	0.0895238	0.0721554	0.112768	0.0901857	0.0605787	0.0722326	0.0791706	0.0963342	0.0957792	0.084048	0.0837563	0.0923825	0.0947192	0.0898876	0.0843949
76110	0.0576441	0.042503	0.0382244	0.0451613	0.0515222	0.0333333	0.0449438	0.0493827	0.056243	0.0558252	0.0469799	0.053012	0.0537772	0.0630027	0.0488145	0.0380228	0.0575163	0.0643501	0.0553411	0.0602883	0.0398458	0.068152	0.056051	0.0541612	0.0762463	0.0668524	0.0817694	0.0672704	0.0556391	0.075419	0.0759036	0.0691057
76228		0.0196078	0.0487805		0	0.0294118	0.0243902	0	0		0	0.105263	0	0						0.0322581	0.0769231		0.114286		0.0285714	0.0571429		0.0285714		0.0212766		0
75181	0.059501	0.0513834	0.0527344	0.0461847	0.0542169	0.0531496	0.0495413	0.0651769	0.0603448	0.0648536	0.051756	0.0963636	0.0750988	0.0590476	0.0711462	0.0701403	0.0692641	0.0757238	0.0588235	0.061657	0.0905077	0.0433735	0.0774059	0.0818182	0.09	0.0867052	0.0471311	0.0650264	0.0727969	0.0585859	0.0550162	0.0974026
75182	0.0860215	0.0816327	0.0543478	0.0428571	0.0632911	0.0625	0.0661157	0.0701754	0.0405405	0.049505	0.0934579	0.075	0.0442478	0.0377358	0.0963855	0.0775862	0.0377358	0.0683761	0.0449438	0.0454545	0.0566038	0.0238095	0.027027	0.0578512	0.0598291	0.0229008	0.0431034	0.036036	0.07	0.0483871	0.0569106	0.047619
76021	0.0646067	0.0505992	0.0484522	0.0554017	0.055325	0.055207	0.0529557	0.0728477	0.0678571	0.0561661	0.062963	0.0576923	0.0730594	0.0753828	0.0741656	0.069378	0.0880196	0.0783818	0.0556186	0.0843521	0.059322	0.0575621	0.0720607	0.0926554	0.084788	0.0923603	0.0857143	0.0757396	0.100236	0.0913405	0.0849598	0.103241
76140	0.0552632	0.0795455	0.0527704	0.0580297	0.0650195	0.068564	0.0538244	0.0723684	0.074401	0.0797872	0.0729443	0.0825806	0.0808081	0.0664207	0.0559796	0.0613267	0.0891892	0.0679245	0.0678617	0.106667	0.0767357	0.0665796	0.0763158	0.0719895	0.107962	0.0877863	0.0735661	0.0858369	0.0800493	0.0785276	0.0869048	0.0716934
76155	0.0425532	0.0454545	0.0461538	0.0555556	0.140351	0.0322581	0.02	0	0.107143	0.0909091	0.0769231	0.0461538	0.0645161	0.016129	0.0535714	0.0185185	0.0416667	0.12	0.119403	0.0806452	0.0540541	0.0454545	0.0923077	0.05	0.0857143	0.0491803	0.0454545	0.0405405	0.0153846	0.0588235	0.0108696	0.0449438
76117	0.0465368	0.0603814	0.0379747	0.043722	0.0492662	0.048731	0.0383352	0.0441676	0.0910952	0.0460157	0.0547486	0.0578807	0.0601036	0.0524434	0.0461216	0.0566893	0.0641593	0.0558859	0.0547645	0.0362401	0.0469584	0.0534591	0.0545455	0.0561661	0.0892655	0.0835322	0.0802326	0.0622797	0.059789	0.0584862	0.0590763	0.0714286
76177		0.030303	0	0.0238095	0.0163934	0.05	0.0759494	0.0240964	0.0833333	0.0561798	0.05	0.0373134	0.0393701	0.0757576	0.0342466	0.046875	0.0884354	0.0428571	0.0588235	0.0839695	0.0898204	0.0827068	0.0641711	0.0404624	0.064257	0.069869	0.054902	0.0771704	0.0583333	0.0690909	0.0373134	0.0801394
76180	0.0593434	0.06743	0.0506009	0.0537836	0.0620104	0.048461	0.0537001	0.0565789	0.0750988	0.069522	0.0683761	0.0837179	0.0754877	0.0781818	0.0680813	0.0643522	0.0856401	0.063964	0.0618834	0.0802792	0.0817186	0.0696379	0.0621469	0.0642378	0.0737628	0.0570305	0.0667904	0.0803324	0.0696143	0.0696258	0.0697279	0.0658228
76112	0.0621302	0.0702028	0.0582892	0.0605795	0.0707819	0.0650278	0.0602317	0.0924765	0.0946416	0.0774042	0.0790455	0.0953488	0.0715409	0.0927602	0.0729685	0.0812348	0.0923957	0.101114	0.0757801	0.101642	0.092549	0.0896	0.106348	0.0864996	0.115813	0.102853	0.115481	0.0912382	0.127778	0.127612	0.0968468	0.101832
76034	0.0349127	0.0494792	0.029484	0.0613636	0.0564516	0.0787879	0.0358209	0.046875	0.077748	0.0522727	0.0605187	0.0690537	0.0608696	0.0755814	0.0635359	0.0535714	0.0710383	0.0725076	0.0784314	0.0721925	0.0616622	0.0786517	0.0661765	0.0464037	0.0849057	0.0888383	0.0919037	0.0603865	0.0771144	0.0782828	0.0353535	0.0536913
76210	0.0678161	0.0702836	0.0554324	0.0524968	0.0750552	0.0543131	0.056272	0.0606421	0.0883978	0.0715909	0.0768386	0.0640067	0.0720189	0.0552221	0.0491991	0.0495595	0.0626398	0.0589623	0.0526316	0.0633166	0.0771812	0.0682327	0.0604752	0.0672182	0.0661914	0.0653805	0.0741573	0.0734043	0.0680729	0.0677596	0.0725894	0.0674487
76035	0.166667	0.04	0.0789474	0.136364	0.1	0.0294118	0.097561	0.0666667	0.0769231	0.0555556	0.037037	0.0512821	0.16		0.114286	0	0.135135	0.025641	0.0392157	0.0638298	0.162791	0.0555556	0.0655738	0.113636	0.1	0.102564	0.075	0.0555556	0.0555556	0.111111	0.0526316	0.097561
76207	0.0882353	0.0683453	0.0690789	0.0361011	0.0618557	0.0666667	0.0798479	0.0699301	0.0760456	0.0782918	0.0363636	0.0638889	0.0613718	0.0598802	0.114478	0.0731707	0.0780347	0.0508475	0.0614887	0.0597484	0.0694864	0.114441	0.0573066	0.073955	0.1	0.099723	0.076087	0.0859375	0.0888383	0.0841837	0.0783784	0.0883191
76116	0.0654721	0.049744	0.0599112	0.0603577	0.0591279	0.0589504	0.0507197	0.0705045	0.0684746	0.0813172	0.0553936	0.0692695	0.0748588	0.0789298	0.0634483	0.0639777	0.0969191	0.0789658	0.0693717	0.0728692	0.0875724	0.0798935	0.0819328	0.0768712	0.0954575	0.107051	0.106009	0.0797774	0.102414	0.102442	0.0984026	0.118223
76208	0.0723982	0.0657371	0.0754717	0.0737527	0.0989474	0.0784708	0.0620155	0.0581395	0.048951	0.0359168	0.0549451	0.058663	0.0731225	0.0573614	0.0609244	0.0557554	0.0900901	0.0510563	0.040404	0.0418944	0.0805369	0.0696296	0.0608974	0.0784983	0.057947	0.0813953	0.081862	0.0618847	0.0725926	0.0701754	0.0585034	0.0488889
75060	0.0460251	0.0504787	0.0569106	0.0550162	0.0486799	0.0510288	0.0667223	0.0497051	0.0877617	0.0732323	0.0583204	0.0795534	0.0701454	0.0731908	0.0536585	0.0652921	0.0627763	0.0762332	0.0609982	0.0680851	0.0772532	0.0702754	0.0613165	0.0545775	0.0435525	0.0703053	0.0577265	0.0791111	0.0527256	0.0664983	0.0659694	0.0729167
75062	0.0424809	0.0490798	0.0544681	0.0476987	0.053654	0.0522317	0.0422414	0.0376203	0.0490909	0.0761374	0.0648995	0.0571652	0.0654028	0.061287	0.0464217	0.0488455	0.0663755	0.0612813	0.0671937	0.0620945	0.0636882	0.0576369	0.0502742	0.0457143	0.0621172	0.045539	0.0450216	0.0640569	0.05625	0.0446512	0.0597871	0.053467
75240	0.0517751	0.0399408	0.0452617	0.0455213	0.0400593	0.0480905	0.0387931	0.0326087	0.0574534	0.061693	0.0463576	0.079857	0.0493066	0.0444444	0.04363	0.0424528	0.0699708	0.0860215	0.0529595	0.0651828	0.0573356	0.0463483	0.0489914	0.0512091	0.0760135	0.047619	0.0608424	0.0506993	0.0694915	0.0700525	0.0630473	0.0616114
75243	0.0641849	0.0570533	0.0522959	0.0545685	0.0619252	0.0540209	0.0571625	0.0737598	0.0709046	0.0689869	0.0623053	0.0844267	0.0665423	0.0674683	0.0636605	0.0757946	0.0763454	0.0715215	0.0627219	0.0690979	0.0757675	0.0767836	0.0698638	0.083871	0.08875	0.0761965	0.0707577	0.0851554	0.0924517	0.0772947	0.0668973	0.0722892
75034	0.057187	0.0547386	0.0481565	0.0458919	0.0589159	0.0472378	0.0430586	0.056	0.0656934	0.0573026	0.0467877	0.0481375	0.0620742	0.054816	0.0635919	0.0590231	0.0522743	0.0382979	0.0447871	0.0693312	0.0694811	0.0606965	0.0517529	0.0699433	0.0667838	0.0596026	0.0611725	0.0689382	0.059357	0.0680672	0.0478548	0.0738725
75453	0.0925926	0.04	0.0793651	0.0437956	0.0603448	0.0824742	0.0721649	0.0789474	0.0792079	0.0483871	0.0740741	0.0909091	0.0666667	0.0560748	0.031746	0.010989	0.0531915	0.0454545	0.0458716	0.059322	0.0673077	0.04	0.04	0.03125	0.105769	0.0288462	0.0588235	0.047619	0.0650407	0.0606061	0.0964912	0.0430108
76690	0		0.030303		0	0			0.0344828	0.0277778	0.115385	0.05		0.0857143						0.0689655			0.0333333	0.0344828		0.0625	0.0789474	0.030303	0.0625	0.0833333	0.03125	0
75103	0.0542299	0.0472973	0.0432692	0.0511811	0.0533333	0.0471698	0.0533981	0.0472637	0.0314607	0.025522	0.0457666	0.0509709	0.047619	0.0431655	0.0429864	0.052381	0.0566893	0.0573566	0.0477528	0.0388601	0.0467532	0.0710784	0.0357995	0.039312	0.0628019	0.0520095	0.0514541	0.0342298	0.0516854	0.0555556	0.0465686	0.0614657
75156	0.0463576	0.0453515	0.0330396	0.0573123	0.0569745	0.0728477	0.0350195	0.0466667	0.0628803	0.0524017	0.0391304	0.0381125	0.0423892	0.041841	0.0443548	0.0513834	0.0584906	0.0561122	0.0496032	0.050813	0.0414938	0.0548204	0.0443038	0.0714286	0.0567108	0.0676533	0.0446247	0.0490196	0.0585859	0.0615942	0.0457516	0.0638723
75082	0.0589888	0.0464548	0.0469613	0.0462725	0.045977	0.0550964	0.0422164	0.0416667	0.0591398	0.0722892	0.0721393	0.0367171	0.0657143	0.0401235	0.0509554	0.0428954	0.0463768	0.0421348	0.022792	0.0362319	0.0372671	0.0543807	0.0469613	0.0646766	0.0637755	0.0532915	0.0621622	0.0555556	0.0616622	0.03125	0.0591549	0.0708215
76103	0.0875	0.0567227	0.0458167	0.0825516	0.0666667	0.0414847	0.0738523	0.0775194	0.0570265	0.0787546	0.0609524	0.0834813	0.0780669	0.0787879	0.0822785	0.0650759	0.06639	0.075388	0.0711538	0.0978261	0.0866142	0.0949074	0.0886364	0.0561798	0.11329	0.0862069	0.0936819	0.0938865	0.106383	0.119804	0.109589	0.122845
76006	0.0555556	0.0573951	0.0508806	0.0381356	0.0615711	0.0590476	0.0492813	0.0500928	0.0612245	0.0642398	0.0690979	0.0669216	0.0810811	0.084	0.0433071	0.0601942	0.0526316	0.0881764	0.0711207	0.0393873	0.0709812	0.0839844	0.0764045	0.0735849	0.0621572	0.0579439	0.0731261	0.0722222	0.0672897	0.0631365	0.0480427	0.0703704
76084	0.0914634	0.0783133	0.0613497	0.0838323	0.035	0.0824176	0.0531915	0.0859729	0.0286885	0.0772727	0.0701754	0.0651163	0.0597826	0.0945946	0.07109	0.0358744	0.0888889	0.0461538	0.0615385	0.0582524	0.059322	0.0611111	0.0641711	0.0677966	0.0466321	0.0588235	0.0566038	0.0849057	0.0979381	0.0740741	0.0773481	0.0546218
75172	0.0458716	0.0645161	0.106383	0.0574713	0.0526316	0.0787402	0.0487805	0.0458716	0.0932203	0.0782609	0.0672269	0.110169	0.121951	0.100917	0.0555556	0.0526316	0.0538462	0.127907	0.0454545	0.072	0.117117	0.0964912	0.102804	0.0280374	0.153061	0.117647	0.155172	0.0980392	0.0377358	0.096	0.0683761	0.0526316
75173	0.0434783	0.0520833	0.135802	0.03125	0.0194175	0.0227273	0.0485437	0.027027	0.0659341	0.0327869	0.125	0.0583333	0.0814815	0.038835	0.03	0.0833333	0.119658	0.0849057	0.0625	0.0638298	0.0394737	0.088	0.0434783	0.0309278	0.0462963	0.0909091	0.0863309	0.057377	0.123967	0.0847458	0.0684932	0.111111
76013	0.0468384	0.0478528	0.0418118	0.0491018	0.0567067	0.0471264	0.0558659	0.0777656	0.0576923	0.0505376	0.0474268	0.0730435	0.0649351	0.0745562	0.070303	0.0561056	0.0586283	0.0672963	0.0840438	0.0694981	0.0738342	0.0682382	0.0723606	0.0658049	0.0872928	0.0776699	0.0911215	0.0673401	0.0696279	0.0653153	0.0703883	0.0734597
76082	0.0733591	0.0582011	0.0510018	0.042065	0.0499076	0.0482625	0.05	0.0721063	0.0665468	0.089317	0.0632911	0.0677362	0.122966	0.0734095	0.0837887	0.0839161	0.107527	0.0689655	0.0811688	0.0767857	0.0842105	0.0920139	0.0765306	0.0904348	0.0968921	0.0880734	0.0622642	0.0760668	0.0886288	0.0742049	0.0866774	0.0750408
75078	0.047619	0.0536913	0.0381679	0.0299401	0.056962	0.0529801	0.0462428	0.0745342	0.100529	0.0684211	0.056872	0.0301003	0.0612245	0.0284091	0.0829493	0.0636364	0.0597015	0.0319635	0.0649351	0.0548523	0.0579151	0.12037	0.0377358	0.0688259	0.077193	0.0511945	0.0361011	0.0617284	0.0788644	0.0599369	0.0813648	0.0641026
75098	0.0683417	0.0618661	0.0514851	0.0606343	0.0765766	0.0688372	0.0589336	0.0522456	0.0642534	0.052927	0.0359281	0.0464939	0.0688073	0.0613757	0.054741	0.0716157	0.0579044	0.0475746	0.0479512	0.0623256	0.0577281	0.0629921	0.0540037	0.0492207	0.0614525	0.0626728	0.0547818	0.0658135	0.0673854	0.0511509	0.0691943	0.0746141
75089	0.0410256	0.0425532	0.0658915	0.0536013	0.059034	0.0531732	0.0450161	0.0592217	0.0695364	0.0481622	0.0509804	0.0497132	0.0417391	0.0747508	0.0418006	0.0617284	0.0608229	0.0567986	0.0444785	0.0689127	0.0590631	0.0765306	0.0358255	0.0697279	0.0501672	0.0452899	0.0487805	0.0502355	0.05939	0.0665635	0.0401189	0.052381
76123	0.0469667	0.0658915	0.0623853	0.0639344	0.0745455	0.0575658	0.0580153	0.0912281	0.0744681	0.0880399	0.0714286	0.096248	0.0670927	0.0820669	0.0783133	0.103161	0.101266	0.0970724	0.0760697	0.0953895	0.0969793	0.0954861	0.0858586	0.0960366	0.100282	0.0981873	0.0959097	0.0767196	0.0907877	0.105898	0.114047	0.0969163
76126	0.061657	0.0658436	0.0493359	0.0679012	0.0628803	0.0542169	0.0648855	0.06	0.0721477	0.0517241	0.0801527	0.0769231	0.0764818	0.0828729	0.0573614	0.0751566	0.08	0.0686869	0.0609756	0.0523013	0.0314342	0.0822785	0.0734127	0.0703704	0.092803	0.104982	0.0733591	0.0848057	0.0702988	0.0825853	0.0735294	0.087395
76085	0.0592885	0.061674	0.0497925	0.0606061	0.0675105	0.0695971	0.0557769	0.0984848	0.0839416	0.0805085	0.0669456	0.0579151	0.114537	0.0553191	0.0744186	0.0790378	0.0766284	0.0714286	0.0856031	0.102273	0.0905512	0.0577778	0.0631579	0.0606061	0.077821	0.0689655	0.077193	0.0428571	0.0649819	0.0730159	0.071161	0.0596026
76102	0.0903614	0.0552326	0.0480226	0.0775194	0.0815217	0.0738636	0.0776119	0.061828	0.0877193	0.0806452	0.0649038	0.0756303	0.0802469	0.0756579	0.0635838	0.0811594	0.0564516	0.0769231	0.0625	0.095082	0.121311	0.0813008	0.0638298	0.058642	0.124555	0.112727	0.10828	0.0745098	0.0928571	0.108844	0.0737463	0.0670927
76008	0.0606061	0.060241	0.0617284	0.0725191	0.0557621	0.0709459	0.0636042	0.0809859	0.0896552	0.0642202	0.056338	0.0675676	0.0752688	0.0827068	0.0652921	0.0638978	0.0596491	0.0766284	0.0894309	0.0694444	0.0686695	0.115672	0.0786517	0.0958084	0.0912052	0.0605096	0.0709459	0.0673077	0.106667	0.058642	0.075188	0.0807453
75202	0.0722892	0.0875	0.158537	0.046875	0.111111	0.0617284	0.0857143	0.125	0.115942	0.0786517	0.123077	0.0617284	0.0943396	0.0512821	0.047619	0.0645161	0.0606061	0.0689655	0.0238095	0	0	0	0.0512821	0.0227273	0.06	0.0714286	0.0689655	0.0322581	0.0322581	0.030303	0.047619	0.1
76131	0.0579399	0.0383212	0.0495238	0.0511364	0.0682196	0.0450281	0.0487365	0.0625	0.0745543	0.0666667	0.0678261	0.0748092	0.0616114	0.0814159	0.0734095	0.0625978	0.0725076	0.0600316	0.0842434	0.0750751	0.0589226	0.056	0.0535714	0.0539359	0.0736196	0.0772532	0.0731343	0.0742188	0.0778739	0.0758706	0.0661157	0.0664251
76133	0.0606695	0.0501393	0.0587808	0.0700867	0.0595836	0.0587002	0.0543155	0.0687679	0.0970201	0.0849802	0.0686141	0.0719844	0.0773196	0.0804124	0.0875964	0.0773732	0.0849315	0.0779221	0.0686204	0.0815451	0.0800543	0.0788382	0.0827338	0.0815627	0.0981241	0.103158	0.0911017	0.0895326	0.0991293	0.10041	0.10787	0.113244
76134	0.0745814	0.0686767	0.0421687	0.0497738	0.0567376	0.0640114	0.0439394	0.0644678	0.0894188	0.0824588	0.0669516	0.0831063	0.0527066	0.0960699	0.0727554	0.0716292	0.0747664	0.0855263	0.091029	0.0874674	0.0883117	0.098916	0.0782123	0.0751043	0.112903	0.0850785	0.0772834	0.110672	0.0978385	0.10143	0.0731429	0.097035
76092	0.0403727	0.0298913	0.0362538	0.0379404	0.0472222	0.0271084	0.0450704	0.0538244	0.0518135	0.0396341	0.0473186	0.0471204	0.0454545	0.0630372	0.041791	0.05	0.0566572	0.0648968	0.0619469	0.0395137	0.0767196	0.05	0.0547945	0.0639269	0.0892857	0.0576369	0.0892857	0.070529	0.0724638	0.0636792	0.0542005	0.0681818
76093	0.084507	0.0410959	0.0357143	0.1	0.15942	0.0697674	0.114754	0.134328	0.126437	0.113924	0.127907	0.076087	0.09	0.0842105	0.0144928	0.04	0.0606061	0.0625	0.078125	0.191781	0.147059	0.0886076	0.105882	0.105882	0.180556	0.166667	0.0689655	0.126316	0.166667	0.118421	0.142857	0.157143
76009	0.0836066	0.0691928	0.0626866	0.056962	0.0617647	0.0736196	0.0715308	0.0651828	0.0653495	0.0805755	0.0705329	0.0710306	0.0619835	0.10472	0.0821918	0.095935	0.0839695	0.0795455	0.088748	0.0804954	0.0912	0.0620805	0.0725309	0.0751174	0.0894569	0.0788253	0.0813772	0.0869565	0.0927152	0.104505	0.0549273	0.0771757
76244											0.0560224	0.0699208	0.0534759	0.0336818	0.0404686	0.0567951	0.072523	0.0542406	0.0504032	0.0442561	0.0664794	0.0622141	0.0548355	0.0673575	0.0873786	0.0717164	0.0759804	0.0728118	0.0778689	0.0694006	0.0726125	0.0693374
76271	0.0566038	0	0.0454545	0	0.133333	0.0434783	0.15625	0.102564	0.0681818	0.0263158		0.0882353	0.075	0.0612245	0.105263	0.0204082	0.0909091	0.0526316	0.0793651	0	0.0877193	0.159091	0.0851064	0.0784314	0.030303	0.0784314	0.0784314	0.121951	0.142857	0	0.0444444	0.133333
76621	0.0277778			0.025				0.0444444				0.0625		0		0.0512821		0.0571429	0.030303		0.0555556			0.0285714		0.0645161	0.212121	0.212121			0.0714286	0.0357143
75135	0.0482759	0.0779221	0.0559441	0.0377358	0.0612245	0.0459184	0.0163043	0.0441989	0.037234	0.0695187	0.0576923	0.0386473	0.060241	0.0301205	0.0392157	0.0258065	0.0718563	0.0697674	0.0413793	0.0404624	0.0642857	0.0791367	0.0283688	0.0361446	0.0753425	0.0580645	0.035533	0.0509554	0.0714286	0.056701	0.0510204	0.0308642
75491	0.0283688	0.0384615	0.0578512	0.0397351	0.0410959	0.0431655	0.0538462	0.0746269	0.0266667	0.0857143	0.0555556	0.0789474	0.0551181	0.0687023	0.0352113	0.0619469	0.068323	0.09	0.0353982	0.0431655	0.0394737	0.0306122	0.046875	0.0846154	0.0516129	0.0699301	0.0318471	0.0551181	0.0534351	0.0758621	0.0866667	0.114286
76020	0.0757576	0.0599201	0.0496644	0.0578947	0.063591	0.0624187	0.0614035	0.0678788	0.0829384	0.0715166	0.0700483	0.087256	0.0736976	0.0701357	0.0792208	0.0803383	0.0719101	0.0801527	0.0603248	0.0712644	0.0747664	0.0834299	0.078853	0.0886999	0.107565	0.129412	0.124711	0.079558	0.107889	0.104752	0.0884279	0.0958019
75043	0.0621827	0.0540166	0.0512996	0.0470027	0.0625806	0.0487179	0.0589404	0.07356	0.0618485	0.0764075	0.0671885	0.0644313	0.0702741	0.0712271	0.0614407	0.0808973	0.0694172	0.0546487	0.0523453	0.0727869	0.0769231	0.0629792	0.0677603	0.0675581	0.0706294	0.0739247	0.058011	0.0636822	0.0693717	0.0926893	0.0836551	0.0808777
76247	0.0632911	0.07	0.0508982	0.0557276	0.0647249	0.0494186	0.0592992	0.0634441	0.0935673	0.0716511	0.0759878	0.0531178	0.0707692	0.0986842	0.0876133	0.0642202	0.0880503	0.0942857	0.0712074	0.0720721	0.096463	0.0965909	0.0843373	0.057971	0.0906149	0.0898204	0.0852273	0.0804598	0.0942408	0.0623145	0.0710227	0.0569801
76015	0.0492505	0.0449679	0.0441501	0.0586854	0.0881671	0.0666667	0.0573566	0.0909091	0.0683761	0.0669546	0.061753	0.0747664	0.0744921	0.0497018	0.0606796	0.0762527	0.086758	0.0651163	0.0780287	0.0627615	0.0810811	0.0758755	0.0575693	0.0613497	0.0711462	0.0953347	0.0738397	0.0685714	0.0641026	0.0796964	0.0629921	0.0658915
76016	0.0535475	0.0614152	0.0681199	0.0786082	0.0550206	0.0646067	0.0518732	0.070761	0.0684211	0.0672704	0.0681234	0.0620915	0.0769231	0.0674699	0.0623342	0.0502646	0.0688202	0.058908	0.0493827	0.0665829	0.0697385	0.0819246	0.0595745	0.0454545	0.0739827	0.0790464	0.0798935	0.0658537	0.112485	0.0973333	0.085639	0.0603136
75114	0.0598291	0.0211268	0.046729	0.1	0.0900901	0.100917	0.0847458	0.0985915	0.0657895	0.0629921	0.0409836	0.05	0.0542636	0.0496454	0.0251572	0.0366972	0.0708661	0.062069	0.0714286	0.0625	0.0747664	0.0718954	0.0597015	0.0583333	0.0743802	0.0869565	0.0930233	0.0655738	0.0380952	0.0621118	0.0487805	0.0666667
75075	0.0764263	0.0754491	0.0558859	0.0554963	0.0803296	0.0747452	0.0688019	0.0665888	0.0700935	0.0649351	0.0714286	0.0707299	0.0904018	0.0700132	0.0681818	0.0696266	0.0659794	0.0763359	0.0512821	0.0700713	0.0804851	0.0675537	0.0744368	0.094693	0.0842391	0.067619	0.0653021	0.0501475	0.0602767	0.0536062	0.0658277	0.0819009
75161	0.0630631	0.0409836	0.0462428	0.0457516	0.0621118	0.025641	0.0753425	0.0580645	0.0701754	0.0561224	0.0689655	0.0662252	0.0784314	0.0980392	0.0252525	0.068323	0.0576923	0.0864198	0.08125	0.0718232	0.1	0.0429448	0.0708661	0.0784314	0.0598802	0.0852273	0.0397727	0.0989011	0.0582011	0.0546448	0.0899471	0.0710383
75152	0.057971	0.0592593	0.0764331	0.0594059	0.0629921	0.04	0.0666667	0.1	0.0496894	0.0147059	0.0923077	0.0884956	0.111111	0.0977444	0.046875	0.1	0.103448	0.0384615	0.0661157	0.0619469	0.0512821	0.0480769	0.1	0.0416667	0.0214286	0.048	0.0314961	0.031746	0.0571429	0.0650407	0.0685714	0.0948905
75051	0.0561905	0.0597426	0.0541872	0.0594499	0.0724382	0.0628116	0.0453333	0.0602837	0.0623902	0.0548523	0.0563847	0.0740452	0.0806608	0.0534562	0.0556046	0.0716814	0.065661	0.072449	0.0625592	0.0955414	0.0763431	0.0747185	0.0635481	0.081592	0.0614035	0.072478	0.0637652	0.0605778	0.0575673	0.0681622	0.064114	0.0747581
75065	0.094697	0.040404	0.0716981	0.0594796	0.0650407	0.0884354	0.0816993	0.0759076	0.0451389	0.0551181	0.0611511	0.0938215	0.0638298	0.0609756	0.063197	0.0909091	0.0697674	0.095057	0.0754098	0.0320285	0.0510204	0.0348432	0.0610932	0.0544872	0.0707692	0.0614334	0.0766773	0.0852459	0.113712	0.0879765	0.0972644	0.102113
75117	0.0377358	0.0357143	0.0569106	0.0175439	0.0204082	0.0485437	0.0344828	0.0275229	0.0384615	0.0396825	0.0620155	0.0662252	0.0409357	0.0416667	0.0296296	0.0215827	0.0909091	0.0719424	0.0471698	0.0510204	0.0588235	0.0387597	0.0530973	0.042735	0.0714286	0.0780142	0.0660377	0.0645161	0.0183486	0.0420168	0.0877193	0.0305344
75092	0.0475524	0.0375375	0.0291121	0.0423601	0.0352564	0.0338462	0.0405186	0.0438185	0.0243205	0.0448916	0.0551053	0.0411523	0.0441176	0.0463097	0.0244275	0.0541796	0.0757143	0.0592593	0.0574713	0.0720268	0.0422535	0.0454545	0.0584708	0.0559758	0.0675287	0.0868984	0.0717185	0.0514286	0.0682148	0.0833333	0.064433	0.0525624
75216	0.092161	0.0806885	0.0834186	0.0779358	0.0951662	0.08	0.0757732	0.0937813	0.0872211	0.0962801	0.0758656	0.0859213	0.0996885	0.086656	0.0954667	0.0853004	0.0942779	0.089379	0.0896252	0.090209	0.0864398	0.0827397	0.0847983	0.105984	0.0988751	0.1	0.0799492	0.0833333	0.100962	0.0923673	0.0863029	0.0981857
75006	0.0652174	0.0534619	0.0475367	0.0691025	0.0634921	0.0565149	0.0604805	0.0590682	0.0593804	0.0708796	0.0523394	0.0748003	0.0732538	0.0612061	0.0624434	0.0663221	0.0650936	0.0593972	0.0643777	0.0679964	0.0700976	0.0591398	0.0540765	0.0635838	0.0643057	0.0623229	0.0614115	0.0717703	0.0613165	0.0495137	0.0655877	0.065
75217	0.0692771	0.0493665	0.0459141	0.0574618	0.0546875	0.0619743	0.0551839	0.0591195	0.0669836	0.0773784	0.0510125	0.0704467	0.0695497	0.063964	0.0650862	0.0843373	0.0623513	0.0749046	0.0603448	0.0793017	0.0751063	0.0651548	0.0655509	0.0756152	0.0632043	0.0726698	0.053791	0.0654028	0.064333	0.073741	0.075327	0.0647059
75110	0.0550363	0.0644028	0.0624303	0.0573123	0.0531716	0.0400746	0.0385375	0.0411817	0.0648855	0.0615977	0.0582348	0.0605769	0.0597156	0.056903	0.0621963	0.0467557	0.0609037	0.0517578	0.0615243	0.0583732	0.0635081	0.0617143	0.0685083	0.0540265	0.0390533	0.0515826	0.0641791	0.0480888	0.0615385	0.0339181	0.0486358	0.0452489
76105	0.0590909	0.0612245	0.0592255	0.0615006	0.0722749	0.0671463	0.0661765	0.0770235	0.0811725	0.0950061	0.0796767	0.0923261	0.0882353	0.075641	0.0624204	0.0662791	0.0848268	0.0709505	0.0598179	0.0761155	0.0753589	0.0737813	0.0698324	0.0640114	0.0742297	0.109395	0.0918079	0.0894942	0.0990099	0.0887978	0.0869565	0.104141
76648	0.0641026	0.0217391	0.0208333	0.0898876	0.0178571	0.0735294	0.0693069	0.047619	0.0776699	0.0352941	0.0675676	0.0555556	0.038835	0.0721649	0.091954	0.0322581	0.0617284	0.0606061	0.0824742	0.0947368	0.0574713	0.107843	0.0533333	0.0340909	0.0654206	0.0253165	0.0869565	0.147059	0.15534	0.130952	0.0561798	0.0941176
76249	0.0914286	0.0693069	0.0594059	0.0580357	0.0885417	0.0384615	0.0845771	0.0658683	0.0950413	0.0691244	0.0986547	0.113793	0.078341	0.0873786	0.0628272	0.0612245	0.0613208	0.0675676	0.10177	0.0933333	0.0944206	0.0753138	0.07109	0.079646	0.0650407	0.0904977	0.0878049	0.0643777	0.0717131	0.101215	0.0243902	0.0786026
75040	0.044598	0.0507937	0.0415842	0.0563934	0.0565908	0.0602007	0.0483221	0.0636183	0.0774411	0.0712484	0.0487956	0.0754098	0.0623686	0.061599	0.0549451	0.0633423	0.07223	0.0672451	0.0512281	0.0757576	0.0650888	0.0632911	0.0534145	0.0646236	0.0636856	0.0670597	0.0604027	0.0651007	0.0745554	0.0854453	0.0633573	0.081864
76129
75475
75164					0.129032		0.0740741	0.0666667				0	0.0714286
75390
75270
75132									0	0.128205		0.0645161
76263
76061				0	0.0416667							0														0.107143	0.0666667
75413
76253
76650
76041
76676
75105
76077
76251																									0	0
76268
76486		0.0465116	0.0652174	0.0322581	0.0810811	0.0731707	0.119048	0.0294118			0	0.025641	0.0454545	0.0666667	0.1875	0.146341	0.0857143	0.0731707	0.025641	0	0.0625	0.0857143	0.128205	0.0277778	0.0588235	0.0769231			0	0.108108	0.0625
76238
76250	0.105263	0.030303		0.0645161	0	0.047619	0	0	0.047619	0.0789474		0	0.0769231	0.0666667	0	0.0714286	0	0.166667	0.133333	0.0322581									0.025	0
76628
76623
76472	0.0857143	0.0294118	0	0.0833333	0.0238095	0.0731707	0	0.0238095	0.0588235	0.0810811	0.0697674	0	0.0540541	0.0909091	0.03125	0.166667	0.04	0.0425532	0.025641	0.2	0.097561	0.0487805	0	0.0833333	0.0344828	0.0769231			0.025641			0.0625
76660															0	0.148148			0.171429												0.107143
75439	0.0625	0	0.0263158		0.0263158		0.025	0.025641	0			0	0.030303	0.0294118		0.0333333		0.0666667		0	0					0.047619	0.0697674			0.114286	0
75153								0.0833333						0.03125					0.0344828
76631
76666
75101	0.129032	0.108108		0.15			0.2	0.135135	0.0666667			0.171429	0.0384615	0.0625		0.2	0.0357143	0.0322581							0.0588235	0.0714286						0.0857143
76070
76490
75157
76127
