# Supplementary material for: Evaluating spatial patterns of seasonal ozone exposure and incidence of respiratory emergency room visits in Dallas-Fort Worth
Source: PeerJ journal article supplement (doi:10.7717/peerj.11066), 2021-04-13
Supplement: Supplement_Table_1.pdf [file Supplement_Table_1.pdf]

| Respiratory Incidence (per 1,000)            |    |       |       |       |       |
|----------------------------------------------|----|-------|-------|-------|-------|
|                                              |    | 1Q    | 2Q    | 3Q    | 4Q    |
| 2007                                         | H: | 426.5 | 388.7 | 393.5 | 441.4 |
|                                              | L: | 94.1  | 68.0  | 61.5  | 56.5  |
| 2008                                         | H: | 475.0 | 386.0 | 375.0 | 440.4 |
|                                              | L: | 88.9  | 86.2  | 84.7  | 97.9  |
| 2011                                         | H: | 439.2 | 409.6 | 437.5 | 500.0 |
|                                              | L: | 125.0 | 86.0  | 66.7  | 112.9 |
| 2012                                         | H: | 494.9 | 400.0 | 422.2 | 444.9 |
|                                              | L: | 87.9  | 90.9  | 76.9  | 111.1 |
| 2015                                         | H: | 514.3 | 463.0 | 500.0 | 455.6 |
|                                              | L: | 142.9 | 77.7  | 91.8  | 96.8  |
| 2016                                         | H: | 497.7 | 422.1 | 411.4 | 435.9 |
|                                              | L: | 105.7 | 111.1 | 54.3  | 77.4  |
| Respiratory Incidence Difference (per 1,000) |    |       |       |       |       |
|                                              |    | 1Q    | 2Q    | 3Q    | 4Q    |
| 2007                                         | D: | 332.4 | 320.7 | 332.0 | 384.9 |
| 2008                                         | D: | 386.1 | 299.8 | 290.3 | 342.5 |
| 2011                                         | D: | 314.2 | 323.6 | 370.8 | 387.1 |
| 2012                                         | D: | 407.1 | 309.1 | 345.3 | 333.8 |
| 2015                                         | D: | 371.4 | 385.3 | 408.2 | 358.8 |
| 2016                                         | D: | 391.9 | 311.0 | 357.1 | 358.5 |
| Average                                      |    | 367.2 | 324.9 | 350.6 | 360.9 |
