# Supplementary material for: Evaluating spatial patterns of seasonal ozone exposure and incidence of respiratory emergency room visits in Dallas-Fort Worth
Source: PeerJ. 2021 Apr 13;9:e11066. doi: 10.7717/peerj.11066 (PMC8051349; doi:10.7717/peerj.11066)
Supplement: Supplemental Information 4 — The data is a summary of the ozone exposures as visualized in Figure 8. [file peerj-09-11066-s004.xlsx]

## Sheet: Sheet1
Ozone ranges by year (ppb)
		1Q	2Q	3Q	4Q
2007	H:	37.907	47.749	53.985	35.748
	L:	29.837	43.182	43.205	34.968
2008	H:	36.832	51.502	55.113	35.885
	L:	35.489	42.096	44.932	34.807
2011	H:	40.485	50.349	66.021	39.081
	L:	34.858	47.95	53.951	34.723
2012	H:	34.516	53.781	53.545	40.293
	L:	33.82	51.799	50.411	34.678
2015	H:	37.003	45.342	53.207	40.391
	L:	29.884	37.574	44.355	33.427
2016	H:	42.066	46.902	47.074	39.143
	L:	34.817	42.884	37.604	31.583
Ozone measurement differences by year (ppb)
		1Q	2Q	3Q	4Q
2007	D:	8.07	4.567	10.78	0.78
2008	D:	1.343	9.406	10.181	1.078
2011	D:	5.627	2.399	12.07	4.358
2012	D:	0.696	1.982	3.134	5.615
2015	D:	7.119	7.768	8.852	6.964
2016	D:	7.249	4.018	9.47	7.56
Average		5.01733	5.02333	9.08117	4.3925
